# Supplementary material for: Foraging and metabolic consequences of semi-anadromy for an endangered estuarine fish
Source: PLoS One. 2017 Mar 14;12(3):e0173497. doi: 10.1371/journal.pone.0173497 (PMC5349674; doi:10.1371/journal.pone.0173497)
Supplement: S3 File — (XLSX) [file pone.0173497.s008.xlsx]

## Sheet: metadata
Column	Explanation
cohort	Year class. For example, '1415' is fish that hatched in 2014 and spawned in 2015
survey	1=summer townet, 2=fall midwater trawl, 3= spring kodiak trawl
hour2	time of day of collection bin. 6 is 6-8am, 8 is 8-10am, 10 is 10-12, 12 is 12-2pm, 14 is 2-4pm
sum_total_prey	The total number of prey in the stomachs
prey_per_zoop	The total number of prey in the stomachs divided by the number of zooplankton in the trawl
mg_per_item	mg per prey item (i.e., weight_gc/sum_total_prey*1000)
percent_weight_gc	(Sum total of calculated prey weight / body weight) * 100
avg_temp	surface water temperature recorded in degrees Celsius
sal_bin_fewer	binned salinity (0.55 is salinity <0.55, 2 is 0.55-2ppt, 4 is 2-4ppt, 6 is 4-6ppt, 8 is 6-8ppt, 8.1 is >8ppt)
avg_turb	a measure of the water clarity in Nephelometric Turbidity Units
zoop_bin_migration	binned zooplankton
sal_dum	salinity bin. <0.55ppt = fresh, >0.55ppt = brackish
prop	percent_weight_gc' expressed as a proportion
asinsqrt	arcsin square root of 'prop'

## Sheet: stomach_fullness_internet
cohort	survey	hour2	sum_total_prey	prey_per_zoop	mg_per_item	percent_weight_gc	avg_temp	sal_bin_fewer	avg_turb	zoop_bin_migration	sal_dum	prop	asinsqrt
1112	1	8	100	0.0127271	0.014703	0.24	20.6	0.55	29.5	7230	fresh	0.0024	0.05
1112	1	8	114	0.0145089	0.0190246	0.41	20.6	0.55	29.5	7230	fresh	0.0041	0.06
1112	1	8	199	0.0253269	0.0311508	0.6	20.6	0.55	29.5	7230	fresh	0.006	0.08
1112	1	8	54	0.00687263	0.023763	0.13	20.6	0.55	29.5	7230	fresh	0.0013	0.04
1112	1	8	95	0.0120907	0.0290632	0.46	20.6	0.55	29.5	7230	fresh	0.0046	0.07
1112	1	8	129	0.0164179	0.0305674	0.41	20.6	0.55	29.5	7230	fresh	0.0041	0.06
1112	1	8	129	0.0164179	0.0313194	0.36	20.6	0.55	29.5	7230	fresh	0.0036	0.06
1112	1	8	35	0.00445448	0.0339343	0.08	20.6	0.55	29.5	7230	fresh	0.0008	0.03
1112	1	8	40	0.00509084	0.0185325	0.17	20.6	0.55	29.5	7230	fresh	0.0017	0.04
1112	1	8	59	0.00750899	0.0274729	0.3	20.6	0.55	29.5	7230	fresh	0.003	0.06
1112	1	8	43	0.00547265	0.0253977	0.15	20.6	0.55	29.5	7230	fresh	0.0015	0.04
1112	1	8	88	0.0111998	0.0234386	0.28	20.6	0.55	29.5	7230	fresh	0.0028	0.05
1112	1	8	43	0.00547265	0.0259465	0.1	20.6	0.55	29.5	7230	fresh	0.001	0.03
1112	1	8	12	0.00152725	0.0361917	0.07	20.6	0.55	29.5	7230	fresh	0.0007	0.03
1112	1	8	10	0.00127271	0.01956	0.06	20.6	0.55	29.5	7230	fresh	0.0006	0.02
1112	1	8	2	0.000254542	0.0247	0.01	20.6	0.55	29.5	7230	fresh	0.0001	0.01
1112	1	8	87	0.0110726	0.0286724	0.47	20.6	0.55	29.5	7230	fresh	0.0047	0.07
1112	1	8	64	0.00814534	0.0301734	0.38	20.6	0.55	29.5	7230	fresh	0.0038	0.06
1112	1	8	95	0.0120907	0.0257158	0.32	20.6	0.55	29.5	7230	fresh	0.0032	0.06
1112	1	8	32	0.00407267	0.0239031	0.08	20.6	0.55	29.5	7230	fresh	0.0008	0.03
1112	1	8	55	0.0069999	0.0276091	0.27	20.6	0.55	29.5	7230	fresh	0.0027	0.05
1112	1	8	19	0.00241815	0.0159737	0.05	20.6	0.55	29.5	7230	fresh	0.0005	0.02
1112	1	8	128	0.0162907	0.0197648	0.38	20.6	0.55	29.5	7230	fresh	0.0038	0.06
1112	1	8	28	0.00356359	0.0210929	0.14	20.6	0.55	29.5	7230	fresh	0.0014	0.04
1112	1	8	32	0.00407267	0.023125	0.17	20.6	0.55	29.5	7230	fresh	0.0017	0.04
1112	1	8	71	0.00903624	0.0262648	0.41	20.6	0.55	29.5	7230	fresh	0.0041	0.06
1112	1	8	58	0.00738171	0.0296483	0.4	20.6	0.55	29.5	7230	fresh	0.004	0.06
1112	1	8	80	0.0101817	0.023285	0.34	20.6	0.55	29.5	7230	fresh	0.0034	0.06
1112	1	8	9	0.00114544	0.0215333	0.05	20.6	0.55	29.5	7230	fresh	0.0005	0.02
1112	1	8	102	0.0129816	0.0222559	0.26	20.6	0.55	29.5	7230	fresh	0.0026	0.05
1112	1	8	22	0.00279996	0.0182591	0.1	20.6	0.55	29.5	7230	fresh	0.001	0.03
1112	1	8	22	0.00279996	0.0257045	0.1	20.6	0.55	29.5	7230	fresh	0.001	0.03
1112	1	8	1	0.000127271	0.0137	0	20.6	0.55	29.5	7230	fresh	0	0.01
1112	1	8	7	0.000890896	0.032	0.06	20.6	0.55	29.5	7230	fresh	0.0006	0.02
1112	1	8	22	0.00279996	0.0134	0.11	20.6	0.55	29.5	7230	fresh	0.0011	0.03
1112	1	8	83	0.0105635	0.0334711	0.39	20.6	0.55	29.5	7230	fresh	0.0039	0.06
1112	1	14	115	0.00595766	0.0123626	0.38	25.5	0.55	35.9	7230	fresh	0.0038	0.06
1112	1	14	46	0.00238306	0.0471783	0.24	25.5	0.55	35.9	7230	fresh	0.0024	0.05
1112	1	14	49	0.00253848	0.0388429	0.26	25.5	0.55	35.9	7230	fresh	0.0026	0.05
1112	1	14	429	0.0222247	0.00605128	0.26	25.5	0.55	35.9	7230	fresh	0.0026	0.05
1112	1	8	17	0.0110961	0.0563	0.21	20.6	4	18.2	2421	brackish	0.0021	0.05
1112	1	8	43	0.0280667	0.055905	0.3	20.6	4	18.2	2421	brackish	0.003	0.05
1112	1	8	67	0.0437318	0.0728425	0.42	20.6	4	18.2	2421	brackish	0.0042	0.06
1112	1	10	16	0.00969054	0.103852	0.39	20.8	2	19	2421	brackish	0.0039	0.06
1112	1	8	47		0.0715843	0.37	20.3	6	47.9		brackish	0.0037	0.06
1112	1	8	27		0.0433852	0.19	20.3	6	47.9		brackish	0.0019	0.04
1112	1	8	113		0.00983009	0.35	20.3	6	47.9		brackish	0.0035	0.06
1112	1	8	9		0.0753	0.15	20.3	6	47.9		brackish	0.0015	0.04
1112	1	8	36		0.0580361	0.32	20.3	6	47.9		brackish	0.0032	0.06
1112	1	8	22		0.0521182	0.4	20.3	6	47.9		brackish	0.004	0.06
1112	1	8	77		0.0128078	0.28	20.3	6	47.9		brackish	0.0028	0.05
1112	1	8	15		0.0832489	0.29	20.3	6	47.9		brackish	0.0029	0.05
1112	1	8	3		0.0452667	0.03	20.3	6	47.9		brackish	0.0003	0.02
1112	1	8	25		0.0880972	0.39	20.3	6	47.9		brackish	0.0039	0.06
1112	1	8	217		0.00739816	0.32	20.3	6	47.9		brackish	0.0032	0.06
1112	1	8	202		0.00954272	0.45	20.3	6	47.9		brackish	0.0045	0.07
1112	1	8	287		0.00951185	0.44	20.3	6	47.9		brackish	0.0044	0.07
1112	1	8	35		0.0958049	0.46	20.3	6	47.9		brackish	0.0046	0.07
1112	1	8	10		0.12046	0.23	20.3	6	47.9		brackish	0.0023	0.05
1112	1	8	51		0.0227016	0.29	20.3	6	47.9		brackish	0.0029	0.05
1112	1	8	3		0.0685	0.04	20.3	6	47.9		brackish	0.0004	0.02
1112	1	8	611		0.00665548	0.99	20.3	6	47.9		brackish	0.0099	0.1
1112	1	8	4		0.109713	0.1	20.3	6	47.9		brackish	0.001	0.03
1112	1	8	15		0.0753796	0.2	20.3	6	47.9		brackish	0.002	0.04
1112	1	10	10	0.00881972	0.119816	0.1	20.8	8	19.9	2421	brackish	0.001	0.03
1112	1	10	2	0.00176394	0.16815	0.02	20.8	8	19.9	2421	brackish	0.0002	0.02
1112	1	8	15	0.00829641	0.204779	0.39	20.2	8.1	22.4	2421	brackish	0.0039	0.06
1112	2	10	59	0.0182223	0.065588	0.42	19.7	6	60.6	2422	brackish	0.0042	0.06
1112	2	12	145		0.0642934	0.84	20	6	77		brackish	0.0084	0.09
1112	2	12	104		0.0600371	0.66	20	6	77		brackish	0.0066	0.08
1112	2	12	290		0.0595948	1.49	20	6	77		brackish	0.0149	0.12
1112	2	12	272	0.109282	0.0588877	1.04	20.1	4	50.5	2422	brackish	0.0104	0.1
1112	2	12	119	0.0478109	0.0526748	0.95	20.1	4	50.5	2422	brackish	0.0095	0.1
1112	2	14	362		0.0479529	1.62	20.7	4	56		brackish	0.0162	0.13
1112	2	14	322		0.0605758	1.54	20.7	4	56		brackish	0.0154	0.12
1112	2	14	430		0.0149516	1.76	20.7	4	56		brackish	0.0176	0.13
1112	2	6	0	0		0	19.1	6	104	2422	brackish	0	0
1112	2	14	184	0.0525361	0.0459901	0.74	21.2	0.55	49.9	7229	fresh	0.0074	0.09
1112	2	8	2		0.0440803	0.01	19.4	4	59.4		brackish	0.0001	0.01
1112	2	8	8		0.0259204	0.03	19.4	4	59.4		brackish	0.0003	0.02
1112	2	8	4		0.203	0.14	19.6	4	111		brackish	0.0014	0.04
1112	2	8	9		0.0581222	0.03	19.9	2	85		brackish	0.0003	0.02
1112	2	8	4		0.06	0.02	19.9	2	85		brackish	0.0002	0.01
1112	2	8	21		0.0689228	0.1	19.9	2	85		brackish	0.001	0.03
1112	2	8	29		0.0654552	0.3	19.9	2	85		brackish	0.003	0.05
1112	2	10	4	0.00415035	0.0753	0.05	19.6	2	91.4	1325	brackish	0.0005	0.02
1112	2	10	49	0.0508418	0.0817098	0.5	19.6	2	91.4	1325	brackish	0.005	0.07
1112	2	10	10	0.0103759	0.0498	0.07	19.6	2	91.4	1325	brackish	0.0007	0.03
1112	2	10	9	0.00933828	0.0518667	0.12	19.6	2	91.4	1325	brackish	0.0012	0.03
1112	2	10	41	0.0425411	0.0256659	0.25	19.6	2	91.4	1325	brackish	0.0025	0.05
1112	2	10	41	0.0425411	0.0863643	0.25	19.6	2	91.4	1325	brackish	0.0025	0.05
1112	2	10	1	0.00103759	0.0549	0	19.6	2	91.4	1325	brackish	0	0.01
1112	2	10	35	0.0363155	0.142441	0.66	19.6	2	91.4	1325	brackish	0.0066	0.08
1112	2	10	25		0.112304	0.19	20.5	0.55	48.4		fresh	0.0019	0.04
1112	2	10	22		0.0595597	0.07	20.5	0.55	48.4		fresh	0.0007	0.03
1112	2	10	40		0.0791485	0.17	20.5	0.55	48.4		fresh	0.0017	0.04
1112	2	10	16		0.0456437	0.05	20.5	0.55	48.4		fresh	0.0005	0.02
1112	2	10	63		0.293066	0.42	20.5	0.55	48.4		fresh	0.0042	0.06
1112	2	12	162		0.0541074	0.63	20.9	0.55	52.6		fresh	0.0063	0.08
1112	2	14	334		0.0501173	0.91	21.2	0.55	39.4		fresh	0.0091	0.1
1112	2	14	247		0.0536158	1.13	21.2	0.55	39.4		fresh	0.0113	0.11
1112	2	10	228	0.0941531	0.0336513	0.48	18.6	6	28.7	2422	brackish	0.0048	0.07
1112	2	14	122		0.0440205	0.57	18.9	2	26		brackish	0.0057	0.08
1112	2	8	57		0.0543	0.18	17.5	0.55	9.1		fresh	0.0018	0.04
1112	2	10	38		0.0519888	0.12	17.9	0.55	10.8		fresh	0.0012	0.03
1112	2	10	35		0.0349171	0.25	18.175	0.55	16.1		fresh	0.0025	0.05
1112	2	10	70		0.0489	0.28	18.175	0.55	16.1		fresh	0.0028	0.05
1112	2	10	1		0.0227	0	18.175	0.55	16.1		fresh	0	0.01
1112	2	10	27	0.0105669	0.057583	0.14	18.29	0.55	17.14	3058	fresh	0.0014	0.04
1112	2	10	99	0.0387452	0.0536778	0.29	18.29	0.55	17.14	3058	fresh	0.0029	0.05
1112	2	12	123		0.0714966	0.58	18.8	0.55	35.2		fresh	0.0058	0.08
1112	2	12	91		0.0578335	0.48	18.8	0.55	35.2		fresh	0.0048	0.07
1112	2	12	143		0.0533529	0.65	18.8	0.55	35.2		fresh	0.0065	0.08
1112	2	12	151		0.0535737	0.74	18.8	0.55	35.2		fresh	0.0074	0.09
1112	2	12	202		0.0550375	0.69	18.8	0.55	35.2		fresh	0.0069	0.08
1112	2	12	59		0.0624661	0.27	18.8	0.55	35.2		fresh	0.0027	0.05
1112	2	12	125		0.0350002	0.25	18.8	0.55	35.2		fresh	0.0025	0.05
1112	2	12	51		0.0555025	0.18	18.8	0.55	35.2		fresh	0.0018	0.04
1112	2	12	163		0.0571795	0.59	18.8	0.55	35.2		fresh	0.0059	0.08
1112	2	12	128		0.0577333	0.41	18.8	0.55	35.2		fresh	0.0041	0.06
1112	2	12	84		0.0639719	0.44	18.8	0.55	35.2		fresh	0.0044	0.07
1112	2	12	169		0.0606675	0.84	18.8	0.55	35.2		fresh	0.0084	0.09
1112	2	12	72		0.0511333	0.46	18.8	0.55	35.2		fresh	0.0046	0.07
1112	2	12	85		0.0556494	0.45	18.8	0.55	35.2		fresh	0.0045	0.07
1112	2	12	159		0.0604971	0.78	18.8	0.55	35.2		fresh	0.0078	0.09
1112	2	12	25		0.053792	0.19	18.8	0.55	35.2		fresh	0.0019	0.04
1112	2	12	115		0.0591411	0.56	18.8	0.55	35.2		fresh	0.0056	0.07
1112	2	12	186		0.0535666	1.43	18.8	0.55	35.2		fresh	0.0143	0.12
1112	2	12	109		0.0647216	0.35	18.8	0.55	35.2		fresh	0.0035	0.06
1112	2	12	198		0.0543389	0.99	18.8	0.55	35.2		fresh	0.0099	0.1
1112	2	12	71		0.0578454	0.51	18.8	0.55	35.2		fresh	0.0051	0.07
1112	2	12	86		0.0615181	0.38	18.8	0.55	35.2		fresh	0.0038	0.06
1112	2	12	102		0.0620794	0.63	18.8	0.55	35.2		fresh	0.0063	0.08
1112	2	12	159	0.0484787	0.0432795	0.78	18.545	2	34.05	2422	brackish	0.0078	0.09
1112	2	12	55	0.0167693	0.067412	0.37	18.545	2	34.05	2422	brackish	0.0037	0.06
1112	2	12	150		0.0640753	0.63	19	2	27.8		brackish	0.0063	0.08
1112	2	12	244		0.0696171	0.8	19	2	27.8		brackish	0.008	0.09
1112	2	12	90		0.0696988	0.43	19	2	27.8		brackish	0.0043	0.07
1112	2	12	98		0.0617493	0.31	19	2	27.8		brackish	0.0031	0.06
1112	2	12	80		0.067705	0.32	19	2	27.8		brackish	0.0032	0.06
1112	2	12	66		0.0615449	0.27	19	2	27.8		brackish	0.0027	0.05
1112	2	12	59		0.0596027	0.36	19	2	27.8		brackish	0.0036	0.06
1112	2	14	130		0.0672654	0.51	18.5	4	33.4		brackish	0.0051	0.07
1112	2	14	109	0.00679873	0.0230746	0.24	17.24	0.55	24.8	7230	fresh	0.0024	0.05
1112	2	14	253	0.0157805	0.00819051	0.26	17.24	0.55	24.8	7230	fresh	0.0026	0.05
1112	2	14	63	0.00392954	0.0473692	0.21	17.24	0.55	24.8	7230	fresh	0.0021	0.05
1112	2	8	0			0	14	8.1	14.2		brackish	0	0
1112	2	10	171		0.0716023	0.74	14.5	8	13.9		brackish	0.0074	0.09
1112	2	10	268		0.0487144	1.16	14.5	8	13.9		brackish	0.0116	0.11
1112	2	12	1898	0.906761	0.0166195	2.41	13.4	6	24.4	2422	brackish	0.0241	0.16
1112	2	12	2057	0.982723	0.0156481	2.17	13.4	6	24.4	2422	brackish	0.0217	0.15
1112	2	12	755	0.360698	0.0183668	0.66	13.4	6	24.4	2422	brackish	0.0066	0.08
1112	2	12	1424	0.68031	0.0173433	1.77	13.4	6	24.4	2422	brackish	0.0177	0.13
1112	2	12	750	0.358309	0.0423029	1.63	13.4	6	24.4	2422	brackish	0.0163	0.13
1112	2	12	1226	0.585716	0.0169432	1.26	13.4	6	24.4	2422	brackish	0.0126	0.11
1112	2	12	1432	0.684132	0.0154721	1.51	13.4	6	24.4	2422	brackish	0.0151	0.12
1112	2	12	1058	0.505455	0.0215647	1.3	13.4	6	24.4	2422	brackish	0.013	0.11
1112	2	12	448	0.21403	0.0287694	1.55	13.4	6	24.4	2422	brackish	0.0155	0.12
1112	2	12	1457	0.696075	0.02322	2.05	13.4	6	24.4	2422	brackish	0.0205	0.14
1112	2	12	41		0.109135	0.39	14.4	8.1	13.5		brackish	0.0039	0.06
1112	2	8	447		0.0378606	1.35	13.5	8	16.1		brackish	0.0135	0.12
1112	2	8	515		0.0409016	1.87	13.5	8	16.1		brackish	0.0187	0.14
1112	2	8	855		0.0356237	1.9	13.5	6	13.7		brackish	0.019	0.14
1112	2	8	19		0.0538053	0.09	13.3	2	24.3		brackish	0.0009	0.03
1112	2	8	43	0.00456308	0.155764	0.4	13.42	2	21.3	2422	brackish	0.004	0.06
1112	2	8	15	0.00159177	1.02547	0.95	13.42	2	21.3	2422	brackish	0.0095	0.1
1112	2	8	32	0.00339578	0.225807	0.47	13.42	2	21.3	2422	brackish	0.0047	0.07
1112	2	8	21	0.00222848	0.100003	0.16	13.42	2	21.3	2422	brackish	0.0016	0.04
1112	2	8	4		5.54772	1.29	13	0.55	21		fresh	0.0129	0.11
1112	2	8	160	0.0413455	0.162248	1.76	12.6	0.55	54.2	7229	fresh	0.0176	0.13
1112	2	8	97	0.0250657	0.078519	0.46	12.6	0.55	54.2	7229	fresh	0.0046	0.07
1112	2	8	90	0.0232569	0.17932	1.02	12.6	0.55	54.2	7229	fresh	0.0102	0.1
1112	2	8	165	0.0426376	0.0963714	0.72	12.6	0.55	54.2	7229	fresh	0.0072	0.09
1112	2	8	5	0.00129205	3.0818	0.72	12.6	0.55	54.2	7229	fresh	0.0072	0.09
1112	2	8	24	0.00620183	0.452828	0.55	12.6	0.55	54.2	7229	fresh	0.0055	0.07
1112	2	8	106	0.0273914	0.0548128	0.35	12.6	0.55	54.2	7229	fresh	0.0035	0.06
1112	2	8	70	0.0180887	0.0571142	0.24	12.6	0.55	54.2	7229	fresh	0.0024	0.05
1112	2	8	13	0.00335932	0.780659	0.58	12.6	0.55	54.2	7229	fresh	0.0058	0.08
1112	2	8	1	0.00025841	1.13399	0.11	12.6	0.55	54.2	7229	fresh	0.0011	0.03
1112	2	10	6	0.00264196	3.09755	0.28	12.5	0.55	75.5	3058	fresh	0.0028	0.05
1112	2	10	11	0.00484359	3.15772	0.62	12.5	0.55	75.5	3058	fresh	0.0062	0.08
1112	2	10	148	0.0651683	0.0826111	0.62	12.5	0.55	75.5	3058	fresh	0.0062	0.08
1112	2	10	67	0.0295019	0.0622781	0.19	12.5	0.55	75.5	3058	fresh	0.0019	0.04
1112	2	10	19	0.0083662	0.460682	0.42	12.5	0.55	75.5	3058	fresh	0.0042	0.07
1112	2	10	34	0.0149711	0.191957	0.26	12.5	0.55	75.5	3058	fresh	0.0026	0.05
1112	2	10	35	0.0154114	0.0801846	0.13	12.5	0.55	75.5	3058	fresh	0.0013	0.04
1112	2	10	63	0.0277406	0.06242	0.37	12.5	0.55	75.5	3058	fresh	0.0037	0.06
1112	2	10	108	0.0716313	0.0734463	0.88	10.6	8	10.6	2421	brackish	0.0088	0.09
1112	2	10	73		0.0695411	0.39	10.3	8.1	12.5		brackish	0.0039	0.06
1112	2	12	80		0.0727953	0.54	10.2	8	15.2		brackish	0.0054	0.07
1112	2	12	268	0.153956	0.0345929	0.61	10.1	8	23	2421	brackish	0.0061	0.08
1112	2	12	706	0.405572	0.0402291	1.21	10.1	8	23	2421	brackish	0.0121	0.11
1112	2	12	292	0.167743	0.0365377	0.58	10.1	8	23	2421	brackish	0.0058	0.08
1112	2	12	104	0.0597443	0.164537	1.02	10.1	8	23	2421	brackish	0.0102	0.1
1112	2	12	620	0.356168	0.0529202	1.87	10.1	8	23	2421	brackish	0.0187	0.14
1112	2	12	306	0.175786	0.0277729	0.83	10.1	8	23	2421	brackish	0.0083	0.09
1112	2	12	304	0.174637	0.0259582	0.74	10.1	8	23	2421	brackish	0.0074	0.09
1112	2	12	654	0.375699	0.040241	1.62	10.1	8	23	2421	brackish	0.0162	0.13
1112	2	12	300	0.172339	0.0379513	0.7	10.1	8	23	2421	brackish	0.007	0.08
1112	2	12	391	0.224615	0.028187	0.53	10.1	8	23	2421	brackish	0.0053	0.07
1112	2	12	400	0.229786	0.0270259	0.7	10.1	8	23	2421	brackish	0.007	0.08
1112	2	12	141	0.0809994	0.0433092	0.32	10.1	8	23	2421	brackish	0.0032	0.06
1112	2	12	256	0.147063	0.0594836	1.02	10.1	8	23	2421	brackish	0.0102	0.1
1112	2	6	163		0.0504	0.4	9.3	8	21.3		brackish	0.004	0.06
1112	2	8	188		0.0466907	0.35	9.5	6	21.8		brackish	0.0035	0.06
1112	2	8	18		0.229123	0.18	9.4	6	12.8		brackish	0.0018	0.04
1112	2	8	18		0.178819	0.18	9.4	6	12.8		brackish	0.0018	0.04
1112	2	8	359		0.0396501	0.95	9.4	6	12.8		brackish	0.0095	0.1
1112	2	8	129		0.0451111	0.42	9.8	6	18.5		brackish	0.0042	0.07
1112	2	8	14		0.054996	0.05	9.8	6	18.5		brackish	0.0005	0.02
1112	2	8	36		0.0326639	0.07	9.8	6	18.5		brackish	0.0007	0.03
1112	2	8	20		0.0979122	0.14	9.8	6	18.5		brackish	0.0014	0.04
1112	2	8	43		0.0311624	0.1	9.8	6	18.5		brackish	0.001	0.03
1112	2	8	152		0.0289736	0.24	9.8	6	18.5		brackish	0.0024	0.05
1112	2	8	172	0.568008	0.0583346	0.45	9.6	6	16.7	1325	brackish	0.0045	0.07
1112	2	8	52	0.171723	0.0728845	0.25	9.6	6	16.7	1325	brackish	0.0025	0.05
1112	2	8	45	0.148607	0.0358292	0.09	9.6	6	16.7	1325	brackish	0.0009	0.03
1112	2	8	236	0.77936	0.0722533	0.99	9.6	6	16.7	1325	brackish	0.0099	0.1
1112	2	8	204	0.673684	0.0563423	0.66	9.6	6	16.7	1325	brackish	0.0066	0.08
1112	2	8	39	0.128793	0.0386941	0.1	9.6	6	16.7	1325	brackish	0.001	0.03
1112	2	8	360		0.00958129	0.35	9.8	6	15.1		brackish	0.0035	0.06
1112	2	8	100		0.0647198	0.31	9.8	6	15.1		brackish	0.0031	0.06
1112	2	10	26		0.0588285	0.08	10.2	4	12.9		brackish	0.0008	0.03
1112	2	12	42	0.01928	0.0529734	0.13	9.4	0.55	10.5	3058	fresh	0.0013	0.04
1112	2	12	32	0.0146895	0.0744985	0.13	9.4	0.55	10.5	3058	fresh	0.0013	0.04
1112	2	12	95	0.0436096	0.0406004	0.22	9.4	0.55	10.5	3058	fresh	0.0022	0.05
1112	2	12	75	0.0344286	0.044944	0.16	9.4	0.55	10.5	3058	fresh	0.0016	0.04
1112	2	12	95	0.0436096	0.0354686	0.27	9.4	0.55	10.5	3058	fresh	0.0027	0.05
1112	2	12	65	0.0298381	0.0571041	0.22	9.4	0.55	10.5	3058	fresh	0.0022	0.05
1112	2	12	77	0.0353467	0.0527634	0.19	9.4	0.55	10.5	3058	fresh	0.0019	0.04
1112	2	12	23	0.0105581	0.0465078	0.06	9.4	0.55	10.5	3058	fresh	0.0006	0.02
1112	2	12	29	0.0133124	0.13426	0.19	9.4	0.55	10.5	3058	fresh	0.0019	0.04
1112	2	12	16	0.00734477	0.0427051	0.04	9.4	0.55	10.5	3058	fresh	0.0004	0.02
1112	2	12	121	0.0555448	0.0317916	0.19	9.4	0.55	10.5	3058	fresh	0.0019	0.04
1112	2	12	32	0.0146895	0.0470507	0.08	9.4	0.55	10.5	3058	fresh	0.0008	0.03
1112	2	12	45	0.0206572	0.0450365	0.13	9.4	0.55	10.5	3058	fresh	0.0013	0.04
1112	2	12	26	0.0119353	0.0425612	0.05	9.4	0.55	10.5	3058	fresh	0.0005	0.02
1112	2	12	39	0.0179029	0.0508553	0.1	9.4	0.55	10.5	3058	fresh	0.001	0.03
1112	2	12	76	0.0348877	0.0496679	0.25	9.4	0.55	10.5	3058	fresh	0.0025	0.05
1112	2	12	153	0.0702344	0.0407279	0.35	9.4	0.55	10.5	3058	fresh	0.0035	0.06
1112	2	12	212	0.0973182	0.0278152	0.5	9.4	0.55	10.5	3058	fresh	0.005	0.07
1112	2	12	94	0.0431505	0.0383131	0.16	9.4	0.55	10.5	3058	fresh	0.0016	0.04
1112	2	12	70	0.0321334	0.0446586	0.17	9.4	0.55	10.5	3058	fresh	0.0017	0.04
1112	2	12	19	0.00872192	0.0494204	0.05	9.4	0.55	10.5	3058	fresh	0.0005	0.02
1112	2	12	23	0.0105581	0.0473696	0.05	9.4	0.55	10.5	3058	fresh	0.0005	0.02
1112	2	12	22	0.0100991	0.0515218	0.06	9.4	0.55	10.5	3058	fresh	0.0006	0.02
1112	2	12	103	0.047282	0.0456286	0.22	9.4	0.55	10.5	3058	fresh	0.0022	0.05
1112	2	12	72	0.0330515	0.0337715	0.1	9.4	0.55	10.5	3058	fresh	0.001	0.03
1112	2	12	37	0.0169848	0.0380552	0.08	9.4	0.55	10.5	3058	fresh	0.0008	0.03
1112	2	12	15	0.00688572	0.051244	0.04	9.4	0.55	10.5	3058	fresh	0.0004	0.02
1112	2	12	5		0.257968	0.06	9.3	0.55	11.6		fresh	0.0006	0.02
1112	2	12	20		0.0711403	0.05	9.3	0.55	11.6		fresh	0.0005	0.02
1112	2	12	9		0.0250194	0.01	9.3	0.55	11.6		fresh	0.0001	0.01
1112	2	12	2		0.0236	0	9.3	0.55	11.6		fresh	0	0.01
1112	2	12	25		0.0446869	0.08	9.3	0.55	11.6		fresh	0.0008	0.03
1112	2	12	4		0.0406286	0.01	9.3	0.55	11.6		fresh	0.0001	0.01
1112	2	12	3		0.0749075	0.01	9.3	0.55	11.6		fresh	0.0001	0.01
1112	2	12	51		0.0368506	0.11	9.3	0.55	11.6		fresh	0.0011	0.03
1112	2	12	88		0.231587	1.34	9.3	0.55	11.6		fresh	0.0134	0.12
1112	2	12	2		0.0128605	0	9.3	0.55	11.6		fresh	0	0.01
1112	2	12	5		0.0108921	0	9.3	0.55	11.6		fresh	0	0.01
1112	2	12	2		0.0269447	0	9.3	0.55	11.6		fresh	0	0.01
1112	2	12	25		0.0309573	0.07	9.3	0.55	11.6		fresh	0.0007	0.03
1112	2	12	15		0.0262932	0.02	9.3	0.55	11.6		fresh	0.0002	0.02
1112	2	12	21		0.0638567	0.08	9.3	0.55	11.6		fresh	0.0008	0.03
1112	2	12	61		0.0263852	0.07	9.3	0.55	11.6		fresh	0.0007	0.03
1112	2	12	11		0.192966	0.12	9.3	0.55	11.6		fresh	0.0012	0.03
1112	2	12	23		0.0426957	0.08	9.3	0.55	11.6		fresh	0.0008	0.03
1112	2	12	8		0.112307	0.06	9.3	0.55	11.6		fresh	0.0006	0.03
1112	2	12	8		0.0409692	0.02	9.3	0.55	11.6		fresh	0.0002	0.01
1112	2	12	7		0.0268786	0.01	9.3	0.55	11.6		fresh	0.0001	0.01
1112	2	12	12		0.0636609	0.04	9.3	0.55	11.6		fresh	0.0004	0.02
1112	2	14	35	0.0144472	0.0607215	0.13	9.5	2	12.3	2422	brackish	0.0013	0.04
1112	2	14	14	0.00577888	0.0203078	0.02	9.5	2	12.3	2422	brackish	0.0002	0.01
1112	2	14	10	0.00412777	0.056145	0.06	9.5	2	12.3	2422	brackish	0.0006	0.02
1112	2	14	24	0.00990666	0.0212483	0.03	9.5	2	12.3	2422	brackish	0.0003	0.02
1112	2	14	232	0.0957644	0.0704559	0.97	9.5	2	12.3	2422	brackish	0.0097	0.1
1112	2	14	27	0.011145	0.0257109	0.04	9.5	2	12.3	2422	brackish	0.0004	0.02
1112	2	14	170	0.0701722	0.0268207	0.22	9.5	2	12.3	2422	brackish	0.0022	0.05
1112	2	14	101		0.0457165	0.34	9.7	4	30.9		brackish	0.0034	0.06
1112	2	14	95		0.0405055	0.22	9.7	4	30.9		brackish	0.0022	0.05
1112	2	14	120		0.0372214	0.38	9.7	4	30.9		brackish	0.0038	0.06
1112	2	14	107		0.0588717	0.59	9.7	4	30.9		brackish	0.0059	0.08
1112	2	14	56		0.0608422	0.31	9.7	4	30.9		brackish	0.0031	0.06
1112	2	14	82		0.0463414	0.28	9.7	4	30.9		brackish	0.0028	0.05
1112	2	14	109		0.0389268	0.33	9.7	4	30.9		brackish	0.0033	0.06
1112	2	14	55		0.0370416	0.14	9.7	4	30.9		brackish	0.0014	0.04
1112	2	14	55		0.0464462	0.16	9.7	4	30.9		brackish	0.0016	0.04
1112	2	14	117		0.0672923	0.73	9.7	4	30.9		brackish	0.0073	0.09
1112	2	14	152		0.0374744	0.48	9.7	4	30.9		brackish	0.0048	0.07
1112	2	14	190		0.0367811	0.63	9.7	4	30.9		brackish	0.0063	0.08
1112	2	8	72		0.328451	1.68	8.5	2	10.4		brackish	0.0168	0.13
1112	2	8	35		0.361672	0.85	8.9	2	8.1		brackish	0.0085	0.09
1112	2	8	8		0.424343	0.16	8.9	2	8.1		brackish	0.0016	0.04
1112	2	10	1	0.00153071	0.0549	0	8.9	0.55	37.8	3058	fresh	0	0.01
1112	2	10	12	0.0183685	0.504457	0.25	8.9	0.55	37.8	3058	fresh	0.0025	0.05
1112	2	10	32	0.0489826	0.0443316	0.07	8.9	0.55	37.8	3058	fresh	0.0007	0.03
1112	2	10	13	0.0198992	0.0493231	0.03	8.9	0.55	37.8	3058	fresh	0.0003	0.02
1112	2	10	24	0.0367369	0.0529708	0.09	8.9	0.55	37.8	3058	fresh	0.0009	0.03
1112	2	10	63	0.0964345	0.0497254	0.17	8.9	0.55	37.8	3058	fresh	0.0017	0.04
1112	2	10	2	0.0036667	2.91618	0.23	9.1	0.55	72.7	3058	fresh	0.0023	0.05
1112	2	10	0	0		0	9.1	0.55	72.7	3058	fresh	0	0
1112	3	10	36		0.0533272	0.11	8.5	4	16		brackish	0.0011	0.03
1112	3	10	16		0.0911374	0.08	8.5	4	16		brackish	0.0008	0.03
1112	3	10	78		0.0972929	0.33	9	6	14		brackish	0.0033	0.06
1112	3	10	26		0.186469	0.26	9	6	14		brackish	0.0026	0.05
1112	3	10	29		0.0844655	0.16	9	6	14		brackish	0.0016	0.04
1112	3	10	19		0.216132	0.25	9	6	14		brackish	0.0025	0.05
1112	3	10	117		0.0371124	0.25	9	6	14		brackish	0.0025	0.05
1112	3	10	41		0.231393	0.66	8.755	8	13.2		brackish	0.0066	0.08
1112	3	12	108		0.0621491	0.37	9.01	8	14.5		brackish	0.0037	0.06
1112	3	12	284		0.0748616	0.89	9.01	8	14.5		brackish	0.0089	0.09
1112	3	12	244		0.0271592	0.32	9.01	8	14.5		brackish	0.0032	0.06
1112	3	12	348		0.0295934	0.4	9.01	8	14.5		brackish	0.004	0.06
1112	3	12	75		0.0703913	0.34	9.01	8	14.5		brackish	0.0034	0.06
1112	3	12	353		0.0375295	0.78	9.01	8	14.5		brackish	0.0078	0.09
1112	3	12	100		0.0504928	0.3	9.01	8	14.5		brackish	0.003	0.05
1112	3	12	191		0.0229775	0.32	9.01	8	14.5		brackish	0.0032	0.06
1112	3	12	262		0.0180634	0.26	9.01	8	14.5		brackish	0.0026	0.05
1112	3	12	36		0.0479778	0.18	9.01	8	14.5		brackish	0.0018	0.04
1112	3	12	359		0.0385433	0.76	9.01	8	14.5		brackish	0.0076	0.09
1112	3	12	283		0.0433414	0.53	9.01	8	14.5		brackish	0.0053	0.07
1112	3	12	149		0.0219666	0.23	9.01	8	14.5		brackish	0.0023	0.05
1112	3	12	197		0.0314173	0.46	9.01	8	14.5		brackish	0.0046	0.07
1112	3	12	71		0.0833386	0.2	9.01	8	14.5		brackish	0.002	0.04
1112	3	12	138		0.0284659	0.3	9.01	8	14.5		brackish	0.003	0.05
1112	3	12	178		0.0258072	0.45	9.01	8	14.5		brackish	0.0045	0.07
1112	3	12	176		0.0364698	0.56	9.01	8	14.5		brackish	0.0056	0.08
1112	3	12	72		0.0454993	0.25	9.01	8	14.5		brackish	0.0025	0.05
1112	3	12	174		0.0219632	0.4	8.88	8.1	12.225		brackish	0.004	0.06
1112	3	12	167		0.0320673	0.28	8.88	8.1	12.225		brackish	0.0028	0.05
1112	3	12	60		0.0388907	0.14	8.88	8.1	12.225		brackish	0.0014	0.04
1112	3	12	22		0.02845	0.04	8.91	8	12.525		brackish	0.0004	0.02
1112	3	12	58		0.0703502	0.19	8.91	8	12.525		brackish	0.0019	0.04
1112	3	12	74		0.048547	0.18	8.91	8	12.525		brackish	0.0018	0.04
1112	3	12	64		0.0426594	0.23	8.91	8	12.525		brackish	0.0023	0.05
1112	3	12	85		0.0524063	0.34	8.91	8	12.525		brackish	0.0034	0.06
1112	3	12	40		0.0521525	0.17	8.91	8	12.525		brackish	0.0017	0.04
1112	3	12	34		0.0440324	0.1	8.91	8	12.525		brackish	0.001	0.03
1112	3	12	225		0.0371608	0.56	8.91	8	12.525		brackish	0.0056	0.07
1112	3	12	154		0.0448159	0.41	8.91	8	12.525		brackish	0.0041	0.06
1112	3	6	21		0.0233667	0.03	8.195	2	9.7		brackish	0.0003	0.02
1112	3	6	7		0.103088	0.04	8.195	2	9.7		brackish	0.0004	0.02
1112	3	6	21		0.162304	0.16	8.195	2	9.7		brackish	0.0016	0.04
1112	3	6	5		0.02926	0.01	8.195	2	9.7		brackish	0.0001	0.01
1112	3	6	8		0.028025	0.01	8.195	2	9.7		brackish	0.0001	0.01
1112	3	6	4		0.024975	0.01	8.195	2	9.7		brackish	0.0001	0.01
1112	3	6	7		0.199588	0.07	8.195	2	9.7		brackish	0.0007	0.03
1112	3	6	9		0.0907778	0.04	8.195	2	9.7		brackish	0.0004	0.02
1112	3	6	6		0.202183	0.09	8.195	2	9.7		brackish	0.0009	0.03
1112	3	6	26		0.0375654	0.07	8.195	2	9.7		brackish	0.0007	0.03
1112	3	8	7		1.30908	0.33	8.205	0.55	11.975		fresh	0.0033	0.06
1112	3	8	32		0.074147	0.12	8.205	0.55	11.975		fresh	0.0012	0.03
1112	3	8	18		0.0472556	0.03	8.205	0.55	11.975		fresh	0.0003	0.02
1112	3	8	35		0.480091	1.1	8.205	0.55	11.975		fresh	0.011	0.1
1112	3	8	21		0.360418	0.39	8.205	0.55	11.975		fresh	0.0039	0.06
1112	3	8	29		0.698419	0.92	8.205	0.55	11.975		fresh	0.0092	0.1
1112	3	8	9		0.484189	0.22	8.205	0.55	11.975		fresh	0.0022	0.05
1112	3	8	12		0.831251	0.4	8.205	0.55	11.975		fresh	0.004	0.06
1112	3	8	46		0.0530022	0.14	8.205	0.55	11.975		fresh	0.0014	0.04
1112	3	8	21		0.0545476	0.07	8.205	0.55	11.975		fresh	0.0007	0.03
1112	3	8	15		0.243837	0.24	8.205	0.55	11.975		fresh	0.0024	0.05
1112	3	8	9		0.469122	0.24	8.205	0.55	11.975		fresh	0.0024	0.05
1112	3	8	68		0.0503715	0.2	8.25	0.55	10.95		fresh	0.002	0.04
1112	3	8	32		0.047325	0.1	8.25	0.55	10.95		fresh	0.001	0.03
1112	3	8	77		0.0480449	0.16	8.215	0.55	10.9		fresh	0.0016	0.04
1112	3	8	50		0.045214	0.11	8.215	0.55	10.9		fresh	0.0011	0.03
1112	3	8	102		0.0402069	0.21	8.215	0.55	10.9		fresh	0.0021	0.05
1112	3	8	66		0.0403803	0.13	8.225	0.55	10.55		fresh	0.0013	0.04
1112	3	8	144		0.0476662	0.34	8.225	0.55	10.55		fresh	0.0034	0.06
1112	3	8	166		0.047628	0.51	8.225	0.55	10.55		fresh	0.0051	0.07
1112	3	8	171		0.0427632	0.35	8.21	0.55	11.95		fresh	0.0035	0.06
1112	3	8	167		0.0329521	0.31	8.21	0.55	11.95		fresh	0.0031	0.06
1112	3	8	131		0.0543469	0.35	8.21	0.55	11.95		fresh	0.0035	0.06
1112	3	8	121		0.0328223	0.29	8.21	0.55	11.95		fresh	0.0029	0.05
1112	3	10	46		0.0560457	0.1	7.875	0.55	29.5		fresh	0.001	0.03
1112	3	10	29		0.0615	0.08	7.875	0.55	29.5		fresh	0.0008	0.03
1112	3	10	47		0.0440566	0.09	7.875	0.55	29.5		fresh	0.0009	0.03
1112	3	10	54		0.0511074	0.14	7.875	0.55	29.5		fresh	0.0014	0.04
1112	3	10	43		0.0624061	0.09	7.875	0.55	29.5		fresh	0.0009	0.03
1112	3	10	73		0.0525075	0.21	7.875	0.55	29.5		fresh	0.0021	0.05
1112	3	10	79		0.0553734	0.3	7.875	0.55	29.5		fresh	0.003	0.06
1112	3	10	62		0.0461371	0.2	7.875	0.55	29.5		fresh	0.002	0.05
1112	3	10	51		0.073016	0.14	7.875	0.55	29.5		fresh	0.0014	0.04
1112	3	10	13		0.0606462	0.05	7.875	0.55	29.5		fresh	0.0005	0.02
1112	3	10	49		0.0445959	0.15	7.875	0.55	29.5		fresh	0.0015	0.04
1112	3	10	84		0.053026	0.29	7.875	0.55	29.5		fresh	0.0029	0.05
1112	3	10	47		0.0569634	0.22	7.875	0.55	29.5		fresh	0.0022	0.05
1112	3	10	60		0.0619932	0.28	7.875	0.55	29.5		fresh	0.0028	0.05
1112	3	10	21		0.0331619	0.04	7.875	0.55	29.5		fresh	0.0004	0.02
1112	3	10	51		0.0571196	0.16	7.875	0.55	29.5		fresh	0.0016	0.04
1112	3	10	56		0.0595857	0.19	7.875	0.55	29.5		fresh	0.0019	0.04
1112	3	10	33		0.051297	0.1	7.875	0.55	29.5		fresh	0.001	0.03
1112	3	10	36		0.05425	0.16	7.875	0.55	29.5		fresh	0.0016	0.04
1112	3	10	37		0.0586243	0.15	7.875	0.55	29.5		fresh	0.0015	0.04
1112	3	10	45		0.0525306	0.19	7.875	0.55	29.5		fresh	0.0019	0.04
1112	3	6	12		0.0176583	0.01	8.36	4	11		brackish	0.0001	0.01
1112	3	6	17		0.0416324	0.05	8.36	4	11		brackish	0.0005	0.02
1112	3	6	5		0.558477	0.15	8.36	4	11		brackish	0.0015	0.04
1112	3	6	22		0.907352	1.21	8.36	4	11		brackish	0.0121	0.11
1112	3	6	20		0.039755	0.08	8.36	4	11		brackish	0.0008	0.03
1112	3	6	22		0.0368779	0.07	8.36	4	11		brackish	0.0007	0.03
1112	3	6	7		0.11425	0.06	8.36	4	11		brackish	0.0006	0.03
1112	3	6	9		0.112549	0.06	8.36	4	11		brackish	0.0006	0.02
1112	3	6	37		0.822217	1.77	8.36	4	11		brackish	0.0177	0.13
1112	3	6	7		0.111648	0.05	8.36	4	11		brackish	0.0005	0.02
1112	3	6	8		0.0625895	0.02	8.36	4	11		brackish	0.0002	0.01
1112	3	6	37		0.119151	0.25	8.36	4	11		brackish	0.0025	0.05
1112	3	6	14		0.150314	0.27	8.36	4	11		brackish	0.0027	0.05
1112	3	6	18		0.308038	0.38	8.36	4	11		brackish	0.0038	0.06
1112	3	8	119		0.0251782	0.23	8.765	8.1	16		brackish	0.0023	0.05
1112	3	8	20		0.15819	0.18	8.765	8.1	16		brackish	0.0018	0.04
1112	3	8	27		0.0815496	0.15	8.765	8.1	16		brackish	0.0015	0.04
1112	3	8	29		0.0874897	0.17	8.765	8.1	16		brackish	0.0017	0.04
1112	3	8	29		0.200379	0.24	8.765	8.1	16		brackish	0.0024	0.05
1112	3	8	57		0.110849	0.25	8.765	8.1	16		brackish	0.0025	0.05
1112	3	8	47		0.106348	0.24	8.765	8.1	16		brackish	0.0024	0.05
1112	3	8	20		0.0941044	0.14	8.765	8.1	16		brackish	0.0014	0.04
1112	3	8	29		0.171915	0.25	8.765	8.1	16		brackish	0.0025	0.05
1112	3	12	542		0.0300579	0.67	8.355	8	18		brackish	0.0067	0.08
1112	3	12	233		0.0334168	0.31	8.355	8	18		brackish	0.0031	0.06
1112	3	12	915		0.0184167	1.17	8.355	8	18		brackish	0.0117	0.11
1112	3	12	309		0.0265356	0.67	8.355	8	18		brackish	0.0067	0.08
1112	3	12	570		0.018444	0.47	8.355	8	18		brackish	0.0047	0.07
1112	3	12	135		0.02896	0.21	8.355	8	18		brackish	0.0021	0.05
1112	3	12	303		0.0402233	0.53	8.355	8	18		brackish	0.0053	0.07
1112	3	12	593		0.0183159	0.55	8.355	8	18		brackish	0.0055	0.07
1112	3	12	534		0.0203648	0.75	8.355	8	18		brackish	0.0075	0.09
1112	3	12	386		0.0242842	0.47	8.355	8	18		brackish	0.0047	0.07
1112	3	12	463		0.029394	0.94	8.355	8	18		brackish	0.0094	0.1
1112	3	12	404		0.0182775	0.53	8.355	8	18		brackish	0.0053	0.07
1112	3	12	90		0.0494222	0.28	8.39	4	24		brackish	0.0028	0.05
1112	3	12	270		0.0278741	0.43	8.39	4	24		brackish	0.0043	0.07
1112	3	12	168		0.047694	0.42	8.39	4	24		brackish	0.0042	0.06
1112	3	12	146		0.038187	0.37	8.39	4	24		brackish	0.0037	0.06
1112	3	12	152		0.0567691	0.36	8.39	4	24		brackish	0.0036	0.06
1112	3	12	73		0.0578274	0.24	8.39	4	24		brackish	0.0024	0.05
1112	3	12	127		0.0562579	0.59	8.39	4	24		brackish	0.0059	0.08
1112	3	12	81		0.0491416	0.21	8.39	4	24		brackish	0.0021	0.05
1112	3	12	321		0.0416265	0.79	8.39	4	24		brackish	0.0079	0.09
1112	3	12	195		0.0393149	0.29	8.39	4	24		brackish	0.0029	0.05
1112	3	12	108		0.04305	0.25	8.39	4	24		brackish	0.0025	0.05
1112	3	12	128		0.0462759	0.57	8.39	4	24		brackish	0.0057	0.08
1112	3	12	190		0.0476416	0.53	8.39	4	24		brackish	0.0053	0.07
1112	3	12	41		0.0773927	0.14	8.39	4	24		brackish	0.0014	0.04
1112	3	12	20		0.05864	0.07	8.39	4	24		brackish	0.0007	0.03
1112	3	12	75		0.042024	0.12	8.39	4	24		brackish	0.0012	0.03
1112	3	12	86		0.0696772	0.3	8.39	4	24		brackish	0.003	0.05
1112	3	12	228		0.0471149	0.35	8.39	4	24		brackish	0.0035	0.06
1112	3	12	90		0.0704894	0.31	11.28	4	53.25		brackish	0.0031	0.06
1112	3	12	176		0.0538816	0.66	11.28	4	53.25		brackish	0.0066	0.08
1112	3	12	357		0.0535683	0.66	11.28	4	53.25		brackish	0.0066	0.08
1112	3	12	258		0.054625	0.75	11.28	4	53.25		brackish	0.0075	0.09
1112	3	12	262		0.0499506	0.68	11.28	4	53.25		brackish	0.0068	0.08
1112	3	12	210		0.0438337	0.5	11.28	4	53.25		brackish	0.005	0.07
1112	3	12	139		0.0777531	0.66	11.28	4	53.25		brackish	0.0066	0.08
1112	3	12	295		0.0554084	0.85	11.28	4	53.25		brackish	0.0085	0.09
1112	3	12	303		0.0482102	0.69	11.28	4	53.25		brackish	0.0069	0.08
1112	3	12	121		0.0472211	0.42	11.28	4	53.25		brackish	0.0042	0.06
1112	3	12	130		0.054342	0.35	11.28	4	53.25		brackish	0.0035	0.06
1112	3	12	124		0.0735054	0.61	11.28	4	53.25		brackish	0.0061	0.08
1112	3	12	157		0.0524326	0.42	11.28	4	53.25		brackish	0.0042	0.07
1112	3	12	287		0.0538394	0.66	11.28	4	53.25		brackish	0.0066	0.08
1112	3	12	298		0.0423788	0.63	11.28	4	53.25		brackish	0.0063	0.08
1112	3	6	34		0.0425928	0.07	10.62	0.55	26.3		fresh	0.0007	0.03
1112	3	6	0			0	10.62	0.55	26.3		fresh	0	0
1112	3	6	3		0.0532692	0.01	10.62	0.55	26.3		fresh	0.0001	0.01
1112	3	8	63		0.0473095	0.11	9.815	0.55	19.55		fresh	0.0011	0.03
1112	3	8	142		0.0462803	0.33	9.815	0.55	19.55		fresh	0.0033	0.06
1112	3	8	48		0.0461437	0.09	9.815	0.55	19.55		fresh	0.0009	0.03
1112	3	8	63		0.0467034	0.2	9.815	0.55	19.55		fresh	0.002	0.04
1112	3	8	27		0.090187	0.16	9.815	0.55	19.55		fresh	0.0016	0.04
1112	3	8	53		0.0504159	0.14	9.815	0.55	19.55		fresh	0.0014	0.04
1112	3	8	43		0.0473212	0.12	9.815	0.55	19.55		fresh	0.0012	0.04
1112	3	8	2		0.0103	0	9.815	0.55	19.55		fresh	0	0
1112	3	8	8		0.0436	0.02	9.815	0.55	19.55		fresh	0.0002	0.01
1112	3	8	50		0.049607	0.17	9.815	0.55	19.55		fresh	0.0017	0.04
1112	3	10	205		0.0463605	0.39	11.065	0.55	20.2		fresh	0.0039	0.06
1112	3	10	139		0.0471036	0.25	11.065	0.55	20.2		fresh	0.0025	0.05
1112	3	10	140		0.0867538	0.48	11.065	0.55	20.2		fresh	0.0048	0.07
1112	3	10	123		0.0451423	0.27	10.71	0.55	30.05		fresh	0.0027	0.05
1112	3	10	11		0.0471273	0.02	10.71	0.55	30.05		fresh	0.0002	0.02
1112	3	10	102		0.0478265	0.3	10.71	0.55	30.05		fresh	0.003	0.05
1112	3	10	96		0.0453271	0.18	10.71	0.55	30.05		fresh	0.0018	0.04
1112	3	10	106		0.048467	0.35	10.71	0.55	30.05		fresh	0.0035	0.06
1112	3	10	76		0.0523289	0.17	10.71	0.55	30.05		fresh	0.0017	0.04
1112	3	10	49		0.0527286	0.17	10.71	0.55	30.05		fresh	0.0017	0.04
1112	3	10	121		0.0633261	0.59	10.71	0.55	30.05		fresh	0.0059	0.08
1112	3	10	143		0.0434343	0.34	10.71	0.55	30.05		fresh	0.0034	0.06
1112	3	10	168		0.0452702	0.36	10.71	0.55	30.05		fresh	0.0036	0.06
1112	3	10	249		0.0659112	0.91	10.71	0.55	30.05		fresh	0.0091	0.1
1112	3	10	169		0.0558414	0.33	10.71	0.55	30.05		fresh	0.0033	0.06
1112	3	10	79		0.0553329	0.16	10.71	0.55	30.05		fresh	0.0016	0.04
1112	3	8	15		0.0641933	0.08	10.635	4	30.9		brackish	0.0008	0.03
1112	3	8	57		0.479058	1.34	10.485	6	29		brackish	0.0134	0.12
1112	3	8	39		1.37622	3.08	10.485	6	29		brackish	0.0308	0.18
1112	3	8	253		0.122557	1.24	10.985	8	24.2		brackish	0.0124	0.11
1112	3	8	80		0.708084	2.28	10.985	8	24.2		brackish	0.0228	0.15
1112	3	10	15		0.343314	0.14	11.335	8.1	52.85		brackish	0.0014	0.04
1112	3	10	35		0.0435029	0.08	11.335	8.1	52.85		brackish	0.0008	0.03
1112	3	12	147		0.0397097	0.29	11.63	4	73.1		brackish	0.0029	0.05
1112	3	12	412		0.0340973	0.58	11.63	4	73.1		brackish	0.0058	0.08
1112	3	12	579		0.0297643	0.61	11.63	4	73.1		brackish	0.0061	0.08
1112	3	12	619		0.0270023	0.77	11.63	4	73.1		brackish	0.0077	0.09
1112	3	12	87		0.0464333	0.37	11.63	4	73.1		brackish	0.0037	0.06
1112	3	12	102		0.0450137	0.29	11.63	4	73.1		brackish	0.0029	0.05
1112	3	12	861		0.0273402	1.53	11.63	4	73.1		brackish	0.0153	0.12
1112	3	12	69		0.0484884	0.19	11.63	4	73.1		brackish	0.0019	0.04
1112	3	12	131		0.0800763	0.42	11.63	4	73.1		brackish	0.0042	0.06
1112	3	12	79		0.0510456	0.23	11.63	4	73.1		brackish	0.0023	0.05
1112	3	12	219		0.0352621	0.42	11.63	4	73.1		brackish	0.0042	0.06
1112	3	12	299		0.0363241	0.65	11.63	4	73.1		brackish	0.0065	0.08
1112	3	12	115		0.0637714	0.33	11.63	4	73.1		brackish	0.0033	0.06
1112	3	12	1215		0.0198791	1.01	10.95	2	53.5		brackish	0.0101	0.1
1112	3	12	740		0.0198682	1.36	10.95	2	53.5		brackish	0.0136	0.12
1112	3	12	831		0.0265095	1.51	10.95	2	53.5		brackish	0.0151	0.12
1112	3	12	924		0.0205965	0.98	10.95	2	53.5		brackish	0.0098	0.1
1112	3	12	1023		0.0187451	0.75	10.95	2	53.5		brackish	0.0075	0.09
1112	3	12	936		0.0268702	1.04	10.95	2	53.5		brackish	0.0104	0.1
1112	3	12	869		0.0211055	1.09	10.95	2	53.5		brackish	0.0109	0.1
1112	3	12	726		0.020618	0.68	10.95	2	53.5		brackish	0.0068	0.08
1112	3	12	1394		0.0267835	1.83	10.95	2	53.5		brackish	0.0183	0.14
1112	3	12	792		0.0254356	0.95	10.95	2	53.5		brackish	0.0095	0.1
1112	3	12	965		0.0243273	1.15	10.95	2	53.5		brackish	0.0115	0.11
1112	3	12	907		0.0208178	1.02	10.95	2	53.5		brackish	0.0102	0.1
1112	3	12	1138		0.0204827	1.19	10.95	2	53.5		brackish	0.0119	0.11
1112	3	12	1058		0.0299302	2.08	10.95	2	53.5		brackish	0.0208	0.14
1112	3	14	384		0.0430045	0.65	11.09	2	44		brackish	0.0065	0.08
1112	3	14	329		0.0468578	0.63	11.09	2	44		brackish	0.0063	0.08
1112	3	14	189		0.059459	0.77	11.09	2	44		brackish	0.0077	0.09
1112	3	14	243		0.0489054	0.35	11.09	2	44		brackish	0.0035	0.06
1112	3	14	255		0.0537303	0.5	11.09	2	44		brackish	0.005	0.07
1112	3	12	479		0.0196163	0.39	12.285	0.55	23.9		fresh	0.0039	0.06
1112	3	12	363		0.0148344	0.21	12.285	0.55	23.9		fresh	0.0021	0.05
1112	3	12	477		0.017486	0.36	12.285	0.55	23.9		fresh	0.0036	0.06
1112	3	12	293		0.035715	0.46	12.285	0.55	23.9		fresh	0.0046	0.07
1112	3	14	69		0.112529	0.34	12.025	4	47.75		brackish	0.0034	0.06
1112	3	14	21		0.230651	0.3	12.025	4	47.75		brackish	0.003	0.05
1112	3	14	48		0.120813	0.28	12.025	4	47.75		brackish	0.0028	0.05
1112	3	14	32		0.0703002	0.1	12.025	4	47.75		brackish	0.001	0.03
1112	3	14	25		0.0503908	0.09	12.025	4	47.75		brackish	0.0009	0.03
1112	3	14	47		0.294916	0.74	12.025	4	47.75		brackish	0.0074	0.09
1112	3	14	19		0.519886	0.51	12.025	4	47.75		brackish	0.0051	0.07
1112	3	14	42		0.521685	0.87	12.225	4	26.4		brackish	0.0087	0.09
1112	3	14	47		1.20942	2.65	12.225	4	26.4		brackish	0.0265	0.16
1112	3	14	83		0.755547	2.78	12.225	4	26.4		brackish	0.0278	0.17
1112	3	8	59		0.0294531	0.07	11.04	0.55	29		fresh	0.0007	0.03
1112	3	8	31		0.0325626	0.05	11.04	0.55	29		fresh	0.0005	0.02
1112	3	8	32		0.0403256	0.06	11.04	0.55	29		fresh	0.0006	0.02
1112	3	8	83		0.0463728	0.16	11.04	0.55	29		fresh	0.0016	0.04
1112	3	8	40		0.0575869	0.1	11.04	0.55	29		fresh	0.001	0.03
1112	3	8	42		0.20403	0.34	11.04	0.55	29		fresh	0.0034	0.06
1112	3	8	175		0.0712574	0.55	11.04	0.55	29		fresh	0.0055	0.07
1112	3	8	41		0.0764618	0.17	11.04	0.55	29		fresh	0.0017	0.04
1112	3	8	36		0.160315	0.26	11.04	0.55	29		fresh	0.0026	0.05
1112	3	8	84		0.0439627	0.12	11.04	0.55	29		fresh	0.0012	0.03
1112	3	8	18		0.165202	0.14	10.92	0.55	33.35		fresh	0.0014	0.04
1112	3	8	57		0.10583	0.23	10.92	0.55	33.35		fresh	0.0023	0.05
1112	3	8	43		0.0884015	0.21	10.92	0.55	33.35		fresh	0.0021	0.05
1112	3	8	56		0.0355748	0.08	10.92	0.55	33.35		fresh	0.0008	0.03
1112	3	8	50		0.030096	0.07	10.92	0.55	33.35		fresh	0.0007	0.03
1112	3	8	69		0.832643	2.38	10.92	0.55	33.35		fresh	0.0238	0.15
1112	3	8	110		0.0472473	0.24	10.92	0.55	33.35		fresh	0.0024	0.05
1112	3	8	54		0.0590173	0.17	10.92	0.55	33.35		fresh	0.0017	0.04
1112	3	8	38		0.0383815	0.06	10.92	0.55	33.35		fresh	0.0006	0.03
1112	3	8	15		0.03944	0.03	10.92	0.55	33.35		fresh	0.0003	0.02
1112	3	8	48		0.0325802	0.05	10.92	0.55	33.35		fresh	0.0005	0.02
1112	3	8	34		0.0818935	0.1	10.92	0.55	33.35		fresh	0.001	0.03
1112	3	8	33		0.700373	1.17	10.99	0.55	35.6		fresh	0.0117	0.11
1112	3	8	22		0.0384639	0.04	10.99	0.55	35.6		fresh	0.0004	0.02
1112	3	8	72		0.0864202	0.21	10.99	0.55	35.6		fresh	0.0021	0.05
1112	3	8	13		0.321007	0.17	10.99	0.55	35.6		fresh	0.0017	0.04
1112	3	8	34		0.0542644	0.08	10.99	0.55	35.6		fresh	0.0008	0.03
1112	3	8	44		0.0335023	0.07	10.99	0.55	35.6		fresh	0.0007	0.03
1112	3	8	8		0.0884682	0.04	10.99	0.55	35.6		fresh	0.0004	0.02
1112	3	8	73		0.0416931	0.14	10.99	0.55	35.6		fresh	0.0014	0.04
1112	3	8	75		0.310628	0.88	10.99	0.55	35.6		fresh	0.0088	0.09
1112	3	8	14		0.0354857	0.02	10.99	0.55	35.6		fresh	0.0002	0.02
1112	3	10	30		0.0459167	0.06	10.865	0.55	46.05		fresh	0.0006	0.02
1112	3	10	102		0.0670647	0.29	10.865	0.55	46.05		fresh	0.0029	0.05
1112	3	10	95		0.0446083	0.26	10.865	0.55	46.05		fresh	0.0026	0.05
1112	3	10	51		0.0370922	0.08	10.865	0.55	46.05		fresh	0.0008	0.03
1112	3	10	181		0.0769249	0.39	10.865	0.55	46.05		fresh	0.0039	0.06
1112	3	10	116		0.0332888	0.17	10.865	0.55	46.05		fresh	0.0017	0.04
1112	3	10	13		0.0476923	0.02	10.865	0.55	46.05		fresh	0.0002	0.01
1112	3	10	213		0.0331047	0.37	10.865	0.55	46.05		fresh	0.0037	0.06
1112	3	10	46		0.044037	0.11	10.865	0.55	46.05		fresh	0.0011	0.03
1112	3	10	256		0.0500016	0.68	10.865	0.55	46.05		fresh	0.0068	0.08
1112	3	10	198		0.0688548	0.66	11.54	0.55	36.4		fresh	0.0066	0.08
1112	3	10	130		0.0731437	0.42	11.54	0.55	36.4		fresh	0.0042	0.06
1112	3	10	170		0.0585988	0.41	11.54	0.55	36.4		fresh	0.0041	0.06
1112	3	10	108		0.0631111	0.45	11.54	0.55	36.4		fresh	0.0045	0.07
1112	3	10	125		0.065264	0.48	11.54	0.55	36.4		fresh	0.0048	0.07
1112	3	10	13		0.0606	0.03	11.54	0.55	36.4		fresh	0.0003	0.02
1112	3	10	196		0.066944	0.7	11.54	0.55	36.4		fresh	0.007	0.08
1112	3	10	14		0.0676929	0.05	11.54	0.55	36.4		fresh	0.0005	0.02
1112	3	10	193		0.0683321	0.73	11.54	0.55	36.4		fresh	0.0073	0.09
1112	3	10	89		0.0663247	0.31	11.54	0.55	36.4		fresh	0.0031	0.06
1112	3	10	44		0.231398	0.89	11.54	0.55	36.4		fresh	0.0089	0.09
1112	3	10	280		0.0551693	0.85	11.54	0.55	36.4		fresh	0.0085	0.09
1112	3	10	44		0.06475	0.16	11.54	0.55	36.4		fresh	0.0016	0.04
1112	3	10	75		0.0659547	0.3	11.54	0.55	36.4		fresh	0.003	0.06
1112	3	10	29		0.156698	0.17	12.94	0.55	42.05		fresh	0.0017	0.04
1112	3	10	50		0.210987	0.32	12.94	0.55	42.05		fresh	0.0032	0.06
1112	3	10	82		0.0705705	0.13	12.94	0.55	42.05		fresh	0.0013	0.04
1112	3	10	51		0.164867	0.59	12.94	0.55	42.05		fresh	0.0059	0.08
1112	3	10	38		0.108378	0.18	12.94	0.55	42.05		fresh	0.0018	0.04
1112	3	10	16		0.139487	0.11	12.94	0.55	42.05		fresh	0.0011	0.03
1112	3	10	26		0.297472	0.3	12.94	0.55	42.05		fresh	0.003	0.05
1112	3	10	81		0.152507	0.53	12.94	0.55	42.05		fresh	0.0053	0.07
1112	3	10	115		0.0687423	0.39	13.17	0.55	25.6		fresh	0.0039	0.06
1112	3	12	200		0.0438735	0.34	13.41	0.55	36.75		fresh	0.0034	0.06
1112	3	12	72		0.0661853	0.21	13.41	0.55	36.75		fresh	0.0021	0.05
1112	3	12	70		0.0431039	0.12	13.41	0.55	36.75		fresh	0.0012	0.03
1112	3	12	99		0.0705232	0.3	13.64	0.55	20.2		fresh	0.003	0.05
1112	3	12	63		0.0612545	0.15	13.64	0.55	20.2		fresh	0.0015	0.04
1112	3	6	1		0.535689	0.02	12.665	0.55	78.35		fresh	0.0002	0.01
1112	3	6	0			0	12.665	0.55	78.35		fresh	0	0
1112	3	6	0			0	12.78	0.55	49.15		fresh	0	0
1112	3	6	62		0.039273	0.09	12.78	0.55	49.15		fresh	0.0009	0.03
1112	3	6	2		0.0884303	0.01	12.78	0.55	49.15		fresh	0.0001	0.01
1112	3	6	136		0.0266625	0.35	12.78	0.55	49.15		fresh	0.0035	0.06
1112	3	6	4		0.0285803	0.01	12.715	0.55	45.95		fresh	0.0001	0.01
1112	3	8	58		0.0356416	0.06	13.16	0.55	38.6		fresh	0.0006	0.02
1112	3	8	9		0.0545556	0.02	13.47	0.55	38.75		fresh	0.0002	0.01
1112	3	8	31		0.100648	0.11	13.47	0.55	38.75		fresh	0.0011	0.03
1112	3	8	15		0.0769798	0.05	13.47	0.55	38.75		fresh	0.0005	0.02
1112	3	8	5		1.26189	0.24	13.47	0.55	38.75		fresh	0.0024	0.05
1112	3	8	47		0.0414404	0.07	13.47	0.55	38.75		fresh	0.0007	0.03
1112	3	8	16		0.0472	0.03	13.47	0.55	38.75		fresh	0.0003	0.02
1112	3	8	0			0	13.47	0.55	38.75		fresh	0	0
1112	3	8	15		0.03722	0.03	13.47	0.55	38.75		fresh	0.0003	0.02
1112	3	10	65		0.0578032	0.14	13.89	0.55	35.4		fresh	0.0014	0.04
1112	3	10	307		0.0654053	0.96	13.89	0.55	35.4		fresh	0.0096	0.1
1112	3	10	160		0.0585305	0.34	13.89	0.55	35.4		fresh	0.0034	0.06
1112	3	10	118		0.0532947	0.28	13.89	0.55	35.4		fresh	0.0028	0.05
1112	3	10	113		0.0399478	0.21	13.89	0.55	35.4		fresh	0.0021	0.05
1112	3	10	5		0.0378379	0.01	13.89	0.55	35.4		fresh	0.0001	0.01
1112	3	10	194		0.0672963	0.5	13.89	0.55	35.4		fresh	0.005	0.07
1112	3	10	116		0.0424745	0.18	13.89	0.55	35.4		fresh	0.0018	0.04
1112	3	10	264		0.0692068	0.74	13.96	0.55	24.7		fresh	0.0074	0.09
1112	3	10	30		0.393367	0.59	13.96	0.55	24.7		fresh	0.0059	0.08
1112	3	10	158		0.0177266	0.24	13.96	0.55	24.7		fresh	0.0024	0.05
1112	3	10	319		0.0700473	0.97	13.96	0.55	24.7		fresh	0.0097	0.1
1112	3	10	102		0.0679946	0.32	13.96	0.55	24.7		fresh	0.0032	0.06
1112	3	10	219		0.0707	0.69	13.96	0.55	24.7		fresh	0.0069	0.08
1112	3	10	560		0.0704848	1.46	13.96	0.55	24.7		fresh	0.0146	0.12
1112	3	10	408		0.065961	1.02	13.96	0.55	24.7		fresh	0.0102	0.1
1112	3	10	48		0.0643313	0.12	13.96	0.55	24.7		fresh	0.0012	0.04
1112	3	10	283		0.0702007	1.12	13.96	0.55	24.7		fresh	0.0112	0.11
1112	3	10	353		0.0702933	1.37	13.96	0.55	24.7		fresh	0.0137	0.12
1112	3	12	27		0.0940437	0.12	13.17	0.55	41.85		fresh	0.0012	0.03
1112	3	12	12		0.22725	0.14	13.17	0.55	41.85		fresh	0.0014	0.04
1112	3	6	2		2.70237	0.26	12.5	0.55	47		fresh	0.0026	0.05
1112	3	6	1		0.3307	0.02	12.915	2	109.4		brackish	0.0002	0.01
1112	3	6	3		0.3307	0.05	12.915	2	109.4		brackish	0.0005	0.02
1112	3	6	13		0.450842	0.24	12.915	2	109.4		brackish	0.0024	0.05
1112	3	6	0			0	12.915	2	109.4		brackish	0	0
1112	3	6	0			0	12.915	2	109.4		brackish	0	0
1112	3	8	13		0.261623	0.18	12.91	2	164.85		brackish	0.0018	0.04
1112	3	10	1		0.0504	0	12.725	2	188.5		brackish	0	0
1112	3	10	10		0.201216	0.09	12.69	0.55	95.4		fresh	0.0009	0.03
1112	3	10	24		0.0932562	0.09	12.69	0.55	95.4		fresh	0.0009	0.03
1112	3	10	11		0.0443545	0.02	12.69	0.55	95.4		fresh	0.0002	0.02
1112	3	10	43		0.0456463	0.11	12.69	0.55	95.4		fresh	0.0011	0.03
1112	3	10	53		0.113852	0.27	12.69	0.55	95.4		fresh	0.0027	0.05
1112	3	10	15		0.116863	0.1	12.69	0.55	95.4		fresh	0.001	0.03
1112	3	10	15		0.0428867	0.03	12.69	0.55	95.4		fresh	0.0003	0.02
1112	3	10	7		0.0471429	0.02	12.69	0.55	95.4		fresh	0.0002	0.01
1112	3	10	78		0.0411128	0.16	12.69	0.55	95.4		fresh	0.0016	0.04
1112	3	10	35		0.102159	0.18	12.69	0.55	95.4		fresh	0.0018	0.04
1112	3	10	117		0.0306045	0.12	13.77	2	97.35		brackish	0.0012	0.03
1112	3	10	296		0.0421888	0.52	13.77	2	97.35		brackish	0.0052	0.07
1112	3	10	92		0.0419106	0.19	13.77	2	97.35		brackish	0.0019	0.04
1112	3	10	132		0.0445311	0.25	13.77	2	97.35		brackish	0.0025	0.05
1112	3	10	120		0.0408668	0.2	13.77	2	97.35		brackish	0.002	0.04
1112	3	10	29		0.0511622	0.08	13.77	2	97.35		brackish	0.0008	0.03
1112	3	10	203		0.0410307	0.31	13.77	2	97.35		brackish	0.0031	0.06
1112	3	10	256		0.0372211	0.4	13.77	2	97.35		brackish	0.004	0.06
1112	3	10	213		0.0240907	0.35	13.77	2	97.35		brackish	0.0035	0.06
1112	3	12	106		0.0224651	0.09	14.15	2	93.7		brackish	0.0009	0.03
1112	3	12	52		0.0837349	0.15	14.15	2	93.7		brackish	0.0015	0.04
1112	3	12	75		0.10198	0.29	14.15	2	93.7		brackish	0.0029	0.05
1112	3	12	701		0.0209612	0.8	14.15	2	93.7		brackish	0.008	0.09
1112	3	12	104		0.08941	0.39	14.15	2	93.7		brackish	0.0039	0.06
1112	3	12	73		0.0512511	0.13	14.15	2	93.7		brackish	0.0013	0.04
1112	3	12	103		0.0345032	0.19	14.15	2	93.7		brackish	0.0019	0.04
1112	3	12	108		0.080974	0.4	14.15	2	93.7		brackish	0.004	0.06
1112	3	12	43		0.103357	0.18	14.15	2	93.7		brackish	0.0018	0.04
1112	3	12	83		0.0713737	0.22	14.15	2	93.7		brackish	0.0022	0.05
1112	3	12	44		0.0660773	0.12	14.15	2	93.7		brackish	0.0012	0.03
1112	3	12	50		0.128419	0.24	14.15	2	93.7		brackish	0.0024	0.05
1112	3	12	15		0.0306602	0.01	13.18	0.55	63.55		fresh	0.0001	0.01
1112	3	12	10		0.449672	0.19	13.18	0.55	63.55		fresh	0.0019	0.04
1112	3	10	179		0.0698794	0.43	18.3	0.55	19		fresh	0.0043	0.07
1112	3	10	500		0.0581532	0.96	18.3	0.55	19		fresh	0.0096	0.1
1112	3	10	282		0.0690118	0.52	18.3	0.55	19		fresh	0.0052	0.07
1112	3	10	534		0.0569378	1.28	18.3	0.55	19		fresh	0.0128	0.11
1112	3	10	223		0.0524171	0.54	18.4	0.55	41		fresh	0.0054	0.07
1112	3	10	206		0.0475039	0.46	18.4	0.55	41		fresh	0.0046	0.07
1112	3	10	191		0.0461398	0.41	18.4	0.55	41		fresh	0.0041	0.06
1112	3	10	121		0.0461273	0.2	18.4	0.55	41		fresh	0.002	0.05
1112	3	10	90		0.0503644	0.19	18.4	0.55	41		fresh	0.0019	0.04
1112	3	12	513		0.050016	1.46	18.8	0.55	24		fresh	0.0146	0.12
1112	3	12	458		0.0571474	1.02	18.9	0.55	13		fresh	0.0102	0.1
1112	3	12	780		0.0606817	2	18.9	0.55	13		fresh	0.02	0.14
1112	3	12	979		0.0595045	1.8	18.9	0.55	13		fresh	0.018	0.13
1112	3	6	6		0.148349	0.04	16.5	0.55	16		fresh	0.0004	0.02
1112	3	6	5		0.173617	0.04	16.5	0.55	16		fresh	0.0004	0.02
1112	3	6	4		0.0349	0.01	16.5	0.55	16		fresh	0.0001	0.01
1112	3	8	62		0.0659194	0.15	17.1	0.55	21		fresh	0.0015	0.04
1112	3	8	214		0.0625237	0.36	17.4	0.55	26		fresh	0.0036	0.06
1112	3	8	256		0.061068	0.41	17.4	0.55	26		fresh	0.0041	0.06
1112	3	8	128		0.0635016	0.29	17.4	0.55	26		fresh	0.0029	0.05
1112	3	8	411		0.062754	0.91	18.3	0.55	33		fresh	0.0091	0.1
1112	3	8	277		0.0664245	0.585695	18.3	0.55	33		fresh	0.00585695	0.08
1112	3	8	172		0.0589727	0.37	18.3	0.55	33		fresh	0.0037	0.06
1112	3	8	52		0.0634538	0.12	18.3	0.55	33		fresh	0.0012	0.03
1112	3	8	51		0.0568706	0.12	18.3	0.55	33		fresh	0.0012	0.03
1112	3	8	588		0.0655794	1.39	18.3	0.55	33		fresh	0.0139	0.12
1112	3	8	1055		0.0441799	2.24	18.3	0.55	33		fresh	0.0224	0.15
1112	3	6	2		0.349629	0.02	17.3	0.55	43		fresh	0.0002	0.01
1112	3	6	3		0.0307667	0	17.3	0.55	43		fresh	0	0.01
1112	3	6	0			0	17.2	2	62		brackish	0	0
1112	3	8	0			0	17.1	4	73		brackish	0	0
1112	3	10	0			0	17.9	2	88		brackish	0	0
1213	1	10	416	0.11263	0.0536635	0.56	20.8	0.55	54.3	7229	fresh	0.0056	0.07
1213	1	10	13	0.0035197	0.0517308	0.37	20.8	0.55	54.3	7229	fresh	0.0037	0.06
1213	1	10	22	0.00595641	0.0429227	0.46	20.8	0.55	54.3	7229	fresh	0.0046	0.07
1213	1	10	31	0.00839312	0.0518968	0.66	20.8	0.55	54.3	7229	fresh	0.0066	0.08
1213	1	10	15	0.00406119	0.0549	0.44	20.8	0.55	54.3	7229	fresh	0.0044	0.07
1213	1	10	37	0.0100176	0.0352351	0.67	20.8	0.55	54.3	7229	fresh	0.0067	0.08
1213	1	10	37	0.0100176	0.0492676	1.02	20.8	0.55	54.3	7229	fresh	0.0102	0.1
1213	1	10	40	0.0108298	0.0312475	0.71	20.8	0.55	54.3	7229	fresh	0.0071	0.08
1213	1	10	39	0.0105591	0.0256564	0.61	20.8	0.55	54.3	7229	fresh	0.0061	0.08
1213	1	10	146	0.0247537	0.0445164	1.26	22.1	0.55	37.4	7229	fresh	0.0126	0.11
1213	1	10	266	0.0450992	0.0389135	1.45	22.1	0.55	37.4	7229	fresh	0.0145	0.12
1213	1	10	10	0.00169546	0.05456	0.27	22.1	0.55	37.4	7229	fresh	0.0027	0.05
1213	1	10	40	0.00678184	0.04143	1.1	22.1	0.55	37.4	7229	fresh	0.011	0.11
1213	1	12	49	0.00514917	0.046949	0.63	23.1	0.55	40.7	7230	fresh	0.0063	0.08
1213	1	12	72	0.00756613	0.00968194	0.46	23.1	0.55	40.7	7230	fresh	0.0046	0.07
1213	1	12	34	0.00357289	0.0418859	0.81	23.1	0.55	40.7	7230	fresh	0.0081	0.09
1213	1	12	28	0.00294238	0.0454036	0.77	23.1	0.55	40.7	7230	fresh	0.0077	0.09
1213	1	12	144	0.0151323	0.0320132	1.15	23.1	0.55	40.7	7230	fresh	0.0115	0.11
1213	1	12	8	0.000840681	0.0498305	0.09	23.1	0.55	40.7	7230	fresh	0.0009	0.03
1213	1	12	54	0.0056746	0.0183593	0.33	23.1	0.55	40.7	7230	fresh	0.0033	0.06
1213	1	14	8	0.00315852	0.0628	0.33	21.1	0.55	19	3058	fresh	0.0033	0.06
1213	1	14	81	0.0112026	0.0697247	1.43	20.95	0.55	25	7230	fresh	0.0143	0.12
1213	1	14	97	0.0134155	0.0612289	0.98	20.95	0.55	25	7230	fresh	0.0098	0.1
1213	1	14	12	0.00165964	0.0680667	0.46	20.95	0.55	25	7230	fresh	0.0046	0.07
1213	1	8	0	0		0	20.05	2	31.6	2422	brackish	0	0
1213	1	8	9	0.00165107	0.0584111	0.38	20.05	2	31.6	2422	brackish	0.0038	0.06
1213	1	8	14	0.00562092	0.0549	0.3	20.55	2	23.9	2422	brackish	0.003	0.05
1213	1	8	1	0.000294661	0.0707	0.05	20.6	4	53	2422	brackish	0.0005	0.02
1213	1	8	1	0.000294661	0.0707	0.04	20.6	4	53	2422	brackish	0.0004	0.02
1213	1	8	4	0.00117864	0.05885	0.15	20.6	4	53	2422	brackish	0.0015	0.04
1213	1	8	62	0.0142399	0.0400516	0.82	18.65	0.55	50.6	7229	fresh	0.0082	0.09
1213	1	8	29	0.00666059	0.0517	0.22	18.65	0.55	50.6	7229	fresh	0.0022	0.05
1213	1	8	57	0.0130915	0.0470018	0.55	18.65	0.55	50.6	7229	fresh	0.0055	0.07
1213	1	8	116	0.0266424	0.0401422	0.96	18.65	0.55	50.6	7229	fresh	0.0096	0.1
1213	1	8	22	0.00505287	0.0399182	0.3	18.65	0.55	50.6	7229	fresh	0.003	0.05
1213	1	10	10	0.00200827	0.0468	0.3	20.7	0.55	31.3	7229	fresh	0.003	0.05
1213	1	10	4	0.000803308	0.0549	0.15	20.7	0.55	31.3	7229	fresh	0.0015	0.04
1213	1	10	36	0.00722977	0.0331083	0.3	20.7	0.55	31.3	7229	fresh	0.003	0.05
1213	1	10	60	0.0120496	0.02584	0.8	20.7	0.55	31.3	7229	fresh	0.008	0.09
1213	1	10	37	0.0074306	0.0260324	0.39	20.7	0.55	31.3	7229	fresh	0.0039	0.06
1213	1	10	58	0.011648	0.0338207	0.96	20.7	0.55	31.3	7229	fresh	0.0096	0.1
1213	1	10	207	0.0415712	0.0335159	1.5	20.7	0.55	31.3	7229	fresh	0.015	0.12
1213	1	10	136	0.0273125	0.0278066	0.81	20.7	0.55	31.3	7229	fresh	0.0081	0.09
1213	1	10	1	0.000179005	0.0707	0.03	20.45	0.55	33.8	7229	fresh	0.0003	0.02
1213	1	10	0	0		0	20.45	0.55	33.8	7229	fresh	0	0
1213	1	10	74	0.0132464	0.0182797	0.21	20.45	0.55	33.8	7229	fresh	0.0021	0.05
1213	1	10	57	0.0102033	0.0191246	0.26	20.45	0.55	33.8	7229	fresh	0.0026	0.05
1213	1	10	91	0.0162895	0.0284607	0.67	20.45	0.55	33.8	7229	fresh	0.0067	0.08
1213	1	10	63	0.0112773	0.0445914	0.57	20.45	0.55	33.8	7229	fresh	0.0057	0.08
1213	1	10	8	0.00143204	0.047525	0.15	20.45	0.55	33.8	7229	fresh	0.0015	0.04
1213	1	10	7	0.00125304	0.0502231	0.14	20.45	0.55	33.8	7229	fresh	0.0014	0.04
1213	1	10	4	0.000716021	0.00465	0.01	20.45	0.55	33.8	7229	fresh	0.0001	0.01
1213	1	10	10	0.00179005	0.04723	0.17	20.45	0.55	33.8	7229	fresh	0.0017	0.04
1213	1	6	0	0		0	19.95	2	21.2	2422	brackish	0	0
1213	1	6	4	0.00103068	0.0549	0.13	19.95	2	21.2	2422	brackish	0.0013	0.04
1213	1	6	48	0.0123682	0.051725	0.82	19.95	2	21.2	2422	brackish	0.0082	0.09
1213	1	6	1	0.000257671	0.0549	0.02	19.95	2	21.2	2422	brackish	0.0002	0.01
1213	1	6	2	0.000515342	0.0628	0.05	19.95	2	21.2	2422	brackish	0.0005	0.02
1213	1	6	1	0.000257671	0.0549	0.02	19.95	2	21.2	2422	brackish	0.0002	0.02
1213	1	6	2	0.000515342	0.0420527	0.05	19.95	2	21.2	2422	brackish	0.0005	0.02
1213	1	6	0	0		0	19.95	2	21.2	2422	brackish	0	0
1213	1	6	4	0.00103068	0.0549	0.08	19.95	2	21.2	2422	brackish	0.0008	0.03
1213	1	8	86	0.0743607	0.0480267	0.51	20.15	4	15.2	2421	brackish	0.0051	0.07
1213	1	8	2	0.00172932	0.0696381	0.07	20.15	4	15.2	2421	brackish	0.0007	0.03
1213	1	12	68	0.00925053	0.0564783	0.81	21.2	2	19.7	2422	brackish	0.0081	0.09
1213	1	6	5	0.00200167	0.0056	0.01	20.15	4	41.8	2422	brackish	0.0001	0.01
1213	1	6	2	0.000800666	0.123013	0.06	20.15	4	41.8	2422	brackish	0.0006	0.03
1213	1	8	5	0.000368733	0.01254	0.01	20.085	0.55	27.4	7230	fresh	0.0001	0.01
1213	1	8	239	0.0176255	0.0148397	0.67	20.085	0.55	27.4	7230	fresh	0.0067	0.08
1213	1	12	19	0.00236514	0.0567053	0.13	23.655	0.55	34.2	7230	fresh	0.0013	0.04
1213	1	12	29	0.00360994	0.0506586	0.12	23.655	0.55	34.2	7230	fresh	0.0012	0.03
1213	1	12	122	0.0151867	0.0461115	0.51	23.655	0.55	34.2	7230	fresh	0.0051	0.07
1213	1	12	106	0.013195	0.0393887	0.3	23.655	0.55	34.2	7230	fresh	0.003	0.05
1213	1	12	51	0.00634852	0.0580196	0.17	23.655	0.55	34.2	7230	fresh	0.0017	0.04
1213	1	8	39	0.0326859	0.0508538	0.27	20.735	0.55	17.1	3058	fresh	0.0027	0.05
1213	1	8	73	0.263772	0.0781736	1.12	20.675	2	23.6	1325	brackish	0.0112	0.11
1213	1	8	145	0.0139621	0.0202372	0.32	20.57	0.55	17.41	7230	fresh	0.0032	0.06
1213	1	10	162	0.0104894	0.0450596	0.65	22.855	0.55	29.4	7230	fresh	0.0065	0.08
1213	1	10	79	0.0051152	0.0424962	0.27	22.855	0.55	29.4	7230	fresh	0.0027	0.05
1213	1	10	82	0.00530944	0.0451866	0.46	22.855	0.55	29.4	7230	fresh	0.0046	0.07
1213	1	10	91	0.00589219	0.0474587	0.55	22.855	0.55	29.4	7230	fresh	0.0055	0.07
1213	1	10	86	0.00556844	0.0474573	0.4	22.855	0.55	29.4	7230	fresh	0.004	0.06
1213	1	10	80	0.00517995	0.0395513	0.31	22.855	0.55	29.4	7230	fresh	0.0031	0.06
1213	1	10	169	0.0109426	0.0517941	0.73	22.855	0.55	29.4	7230	fresh	0.0073	0.09
1213	1	10	35	0.00226623	0.0476657	0.16	22.855	0.55	29.4	7230	fresh	0.0016	0.04
1213	1	12	54	0.0215044	0.04285	0.28	21.73	0.55	19.3	3058	fresh	0.0028	0.05
1213	1	12	12	0.00477875	0.0368583	0.05	21.73	0.55	19.3	3058	fresh	0.0005	0.02
1213	1	12	278	0.471644	0.00597878	0.33	20.6833	6	37.7	1325	brackish	0.0033	0.06
1213	1	12	14	0.0237518	0.143244	0.17	20.6833	6	37.7	1325	brackish	0.0017	0.04
1213	1	6	0	0		0	20.2167	4	22.45	2421	brackish	0	0
1213	2	8	1		0.0056	0	18.6467	8.1	8.6		brackish	0	0
1213	2	8	1	0.000103471	0.2196	0.02	18.13	2	20.05	2422	brackish	0.0002	0.02
1213	2	8	1	0.000103471	2.27814	0.16	18.13	2	20.05	2422	brackish	0.0016	0.04
1213	2	8	1	0.000103471	0.0124672	0	18.13	2	20.05	2422	brackish	0	0
1213	2	8	87		0.0300437	0.19	18.2367	4	20.45		brackish	0.0019	0.04
1213	2	8	52		0.063175	0.25	18.2367	4	20.45		brackish	0.0025	0.05
1213	2	8	12		0.0459833	0.05	18.2367	4	20.45		brackish	0.0005	0.02
1213	2	8	4		0.05195	0.02	18.2367	4	20.45		brackish	0.0002	0.01
1213	2	8	8		0.565323	0.38	18.21	4	17.4		brackish	0.0038	0.06
1213	2	8	31		0.463434	0.66	17.8367	2	23.6		brackish	0.0066	0.08
1213	2	8	19		0.954974	1.03	17.8367	2	23.6		brackish	0.0103	0.1
1213	2	8	11		4.04028	2.25	17.8367	2	23.6		brackish	0.0225	0.15
1213	2	8	36		0.379516	0.85	17.8367	2	23.6		brackish	0.0085	0.09
1213	2	8	7		5.33264	2.15	17.8367	2	23.6		brackish	0.0215	0.15
1213	2	8	7		0.921424	0.47	17.8367	2	23.6		brackish	0.0047	0.07
1213	2	8	4		4.08133	0.95	17.8367	2	23.6		brackish	0.0095	0.1
1213	2	8	45		0.278544	0.75	17.8367	2	23.6		brackish	0.0075	0.09
1213	2	8	5	0.000254795	4.27716	1.24	18.0067	2	26.2	2422	brackish	0.0124	0.11
1213	2	8	11	0.000560548	3.24721	2.03	18.0067	2	26.2	2422	brackish	0.0203	0.14
1213	2	8	17	0.000866302	1.82357	1.59	18.0067	2	26.2	2422	brackish	0.0159	0.13
1213	2	10	4		4.08133	0.95	17.88	0.55	21.25		fresh	0.0095	0.1
1213	2	8	4	0.000119178	0.816721	0.25	18.65	0.55	23.85	7230	fresh	0.0025	0.05
1213	2	8	127	0.013137	0.350549	2.17	19	0.55	32.05	7230	fresh	0.0217	0.15
1213	2	8	128		0.058522	0.36	14.695	2	18.3		brackish	0.0036	0.06
1213	2	8	33		0.494388	0.6	14.695	2	18.3		brackish	0.006	0.08
1213	2	8	220		0.0930651	0.93	14.695	2	18.3		brackish	0.0093	0.1
1213	2	8	13	0.0348916	2.73815	1.56	14.76	2	21.2	1325	brackish	0.0156	0.13
1213	2	8	56	0.150302	0.05335	0.12	14.76	2	21.2	1325	brackish	0.0012	0.03
1213	2	8	28	0.0751512	0.0543786	0.09	14.76	2	21.2	1325	brackish	0.0009	0.03
1213	2	8	36	0.096623	0.1907	0.33	14.76	2	21.2	1325	brackish	0.0033	0.06
1213	2	8	5	0.0134199	0.664357	0.24	14.76	2	21.2	1325	brackish	0.0024	0.05
1213	2	8	60		0.0597312	0.18	14.325	0.55	20.2		fresh	0.0018	0.04
1213	2	8	72	0.0169813	0.0973189	0.33	14.6833	0.55	26.4	7229	fresh	0.0033	0.06
1213	2	10	33	0.0104983	0.0533402	0.07	14.8167	0.55	34.9	7229	fresh	0.0007	0.03
1213	2	12	5		0.0266521	0	13.645	2	35		brackish	0	0.01
1213	2	8	477	0.604661	0.0282599	0.6	13.87	4	25.7	1325	brackish	0.006	0.08
1213	2	8	6		0.189669	0.05	13.125	2	41.9		brackish	0.0005	0.02
1213	2	8	93		0.038113	0.23	13.2	2	47.2		brackish	0.0023	0.05
1213	2	8	13		0.028683	0.03	13.2	2	47.2		brackish	0.0003	0.02
1213	2	10	7	0.00644218	0.279335	0.2	13.225	0.55	51.1	3058	fresh	0.002	0.04
1213	2	10	2	0.00184062	1.43504	0.1	13.225	0.55	51.1	3058	fresh	0.001	0.03
1213	2	12	454	0.470143	0.0364426	0.63	12.71	0.55	70.9	3058	fresh	0.0063	0.08
1213	2	12	72	0.0400306	0.0379837	0.14	13.29	0.55	71.3	3058	fresh	0.0014	0.04
1213	2	14	144		0.0449284	0.28	13.38	0.55	44.3		fresh	0.0028	0.05
1213	2	12	233	0.295446	0.0532758	0.49	11.425	0.55	66.7	3058	fresh	0.0049	0.07
1213	3	12	123		0.0424528	0.13	7.69	0.55	44.15		fresh	0.0013	0.04
1213	3	8	330		0.0396424	0.33	7.577	0.55	31.205		fresh	0.0033	0.06
1213	3	8	461		0.0471507	0.79	7.577	0.55	31.205		fresh	0.0079	0.09
1213	3	8	204		0.040397	0.3	7.577	0.55	31.205		fresh	0.003	0.06
1213	3	10	42		0.0432452	0.08	7.94733	0.55	55.005		fresh	0.0008	0.03
1213	3	10	10		0.177184	0.07	7.94733	0.55	55.005		fresh	0.0007	0.03
1213	3	10	3		0.0288667	0	7.94733	0.55	55.005		fresh	0	0.01
1213	3	10	67		0.044803	0.09	7.94733	0.55	55.005		fresh	0.0009	0.03
1213	3	10	18		0.0638778	0.07	7.94733	0.55	55.005		fresh	0.0007	0.03
1213	3	10	30		0.05642	0.07	7.94733	0.55	55.005		fresh	0.0007	0.03
1213	3	10	7		0.124633	0.05	7.94733	0.55	55.005		fresh	0.0005	0.02
1213	3	10	31		0.0633129	0.17	7.94733	0.55	55.005		fresh	0.0017	0.04
1213	3	10	27		0.0619815	0.08	7.94733	0.55	55.005		fresh	0.0008	0.03
1213	3	10	76		0.0654434	0.19	7.94733	0.55	55.005		fresh	0.0019	0.04
1213	3	10	140		0.03176	0.3	7.94733	0.55	55.005		fresh	0.003	0.06
1213	3	10	49		0.0429327	0.11	7.94733	0.55	55.005		fresh	0.0011	0.03
1213	3	10	52		0.0480346	0.15	7.94733	0.55	55.005		fresh	0.0015	0.04
1213	3	10	54		0.041237	0.07	7.94733	0.55	55.005		fresh	0.0007	0.03
1213	3	10	29		0.0748386	0.2	7.94733	0.55	55.005		fresh	0.002	0.04
1213	3	10	72		0.0412514	0.15	7.94733	0.55	55.005		fresh	0.0015	0.04
1213	3	10	61		0.0323984	0.07	7.94733	0.55	55.005		fresh	0.0007	0.03
1213	3	10	30		0.0457	0.11	7.94733	0.55	55.005		fresh	0.0011	0.03
1213	3	10	23		0.0598051	0.03	7.94733	0.55	55.005		fresh	0.0003	0.02
1213	3	10	54		0.0446185	0.13	7.94733	0.55	55.005		fresh	0.0013	0.04
1213	3	10	236		0.0379669	0.42	7.94733	0.55	55.005		fresh	0.0042	0.07
1213	3	10	13		0.0781573	0.04	7.94733	0.55	55.005		fresh	0.0004	0.02
1213	3	10	44		0.0416955	0.17	7.94733	0.55	55.005		fresh	0.0017	0.04
1213	3	10	28		0.0443865	0.06	7.94733	0.55	55.005		fresh	0.0006	0.02
1213	3	10	30		0.04313	0.06	7.94733	0.55	55.005		fresh	0.0006	0.02
1213	3	10	62		0.079575	0.18	7.94733	0.55	55.005		fresh	0.0018	0.04
1213	3	10	40		0.03663	0.07	7.94733	0.55	55.005		fresh	0.0007	0.03
1213	3	10	26		0.0397077	0.05	7.94733	0.55	55.005		fresh	0.0005	0.02
1213	3	10	19		0.0493947	0.04	7.94733	0.55	55.005		fresh	0.0004	0.02
1213	3	10	48		0.0378396	0.09	7.94733	0.55	55.005		fresh	0.0009	0.03
1213	3	10	134		0.0602328	0.49	7.94733	0.55	55.005		fresh	0.0049	0.07
1213	3	12	358		0.0450207	0.86	7.707	0.55	35.885		fresh	0.0086	0.09
1213	3	12	216		0.0500218	0.49	7.80333	0.55	28.44		fresh	0.0049	0.07
1213	3	12	208		0.0601043	0.4	7.80333	0.55	28.44		fresh	0.004	0.06
1213	3	12	157		0.0436389	0.35	7.80333	0.55	28.44		fresh	0.0035	0.06
1213	3	12	207		0.0465118	0.58	7.80333	0.55	28.44		fresh	0.0058	0.08
1213	3	8	18		0.36338	0.21	7.40133	2	75.905		brackish	0.0021	0.05
1213	3	8	7		0.167271	0.05	7.47	2	107.495		brackish	0.0005	0.02
1213	3	8	6		0.177341	0.04	7.47	2	107.495		brackish	0.0004	0.02
1213	3	8	9		0.0943099	0.04	7.47	2	107.495		brackish	0.0004	0.02
1213	3	8	14		0.181721	0.08	7.47	2	107.495		brackish	0.0008	0.03
1213	3	8	53		0.10179	0.21	7.47	2	107.495		brackish	0.0021	0.05
1213	3	8	7		0.522721	0.09	7.47	2	107.495		brackish	0.0009	0.03
1213	3	8	23		0.157144	0.2	7.47	2	107.495		brackish	0.002	0.04
1213	3	8	23		0.101417	0.11	7.47	2	107.495		brackish	0.0011	0.03
1213	3	8	24		0.885495	0.86	7.47	2	107.495		brackish	0.0086	0.09
1213	3	8	3		0.143833	0.02	7.47	2	107.495		brackish	0.0002	0.01
1213	3	8	27		0.414784	0.45	7.47	2	107.495		brackish	0.0045	0.07
1213	3	8	6		2.15658	0.35	7.47	2	107.495		brackish	0.0035	0.06
1213	3	8	26		0.170639	0.17	7.47	2	107.495		brackish	0.0017	0.04
1213	3	8	29		0.0714097	0.1	7.47	2	107.495		brackish	0.001	0.03
1213	3	8	14		0.218068	0.12	7.47	2	107.495		brackish	0.0012	0.03
1213	3	8	34		0.100638	0.17	7.47	2	107.495		brackish	0.0017	0.04
1213	3	10	36		0.385236	0.5	7.81333	4	121.985		brackish	0.005	0.07
1213	3	10	17		0.317208	0.2	7.81333	4	121.985		brackish	0.002	0.04
1213	3	14	88		0.0372682	0.14	7.99967	2	56.195		brackish	0.0014	0.04
1213	3	14	384		0.0404927	0.81	7.99967	2	56.195		brackish	0.0081	0.09
1213	3	8	31		0.0681613	0.12	9.46667	0.55	39.75		fresh	0.0012	0.03
1213	3	8	32		0.0538812	0.07	9.46667	0.55	39.75		fresh	0.0007	0.03
1213	3	8	26		0.0611808	0.12	9.46667	0.55	39.75		fresh	0.0012	0.04
1213	3	8	49		0.0721106	0.18	9.46667	0.55	39.75		fresh	0.0018	0.04
1213	3	8	12		0.051675	0.03	9.46667	0.55	39.75		fresh	0.0003	0.02
1213	3	8	21		0.0637	0.09	9.46667	0.55	39.75		fresh	0.0009	0.03
1213	3	8	49		0.0379755	0.07	9.46667	0.55	39.75		fresh	0.0007	0.03
1213	3	8	53		0.056717	0.14	9.46667	0.55	39.75		fresh	0.0014	0.04
1213	3	8	32		0.0775816	0.09	9.46667	0.55	39.75		fresh	0.0009	0.03
1213	3	8	56		0.0427054	0.15	9.46667	0.55	39.75		fresh	0.0015	0.04
1213	3	8	61		0.0579347	0.13	9.95333	0.55	20.25		fresh	0.0013	0.04
1213	3	12	13		0.0643528	0.03	9.99667	4	52.35		brackish	0.0003	0.02
1213	3	12	117		0.0370162	0.14	9.99667	4	52.35		brackish	0.0014	0.04
1213	3	12	57		0.0400632	0.09	9.99667	4	52.35		brackish	0.0009	0.03
1213	3	12	297		0.380208	3.8	9.99667	4	52.35		brackish	0.038	0.2
1213	3	12	69		0.0613876	0.23	9.99667	4	52.35		brackish	0.0023	0.05
1213	3	12	129		0.0511705	0.2	10.4167	2	78.3		brackish	0.002	0.04
1213	3	12	219		0.0452562	0.44	10.4167	2	78.3		brackish	0.0044	0.07
1213	3	12	737		0.0251482	0.91	10.4167	2	78.3		brackish	0.0091	0.1
1213	3	12	66		0.0439712	0.11	10.4167	2	78.3		brackish	0.0011	0.03
1213	3	12	388		0.0331461	0.41	10.4167	2	78.3		brackish	0.0041	0.06
1213	3	12	229		0.0399812	0.36	10.4167	2	78.3		brackish	0.0036	0.06
1213	3	12	223		0.0400933	0.36	10.4167	2	78.3		brackish	0.0036	0.06
1213	3	12	565		0.035837	0.46	10.4167	2	78.3		brackish	0.0046	0.07
1213	3	12	254		0.0349374	0.26	10.4167	2	78.3		brackish	0.0026	0.05
1213	3	12	203		0.053276	0.28	10.4167	2	78.3		brackish	0.0028	0.05
1213	3	12	238		0.0314811	0.27	10.4833	2	59.3		brackish	0.0027	0.05
1213	3	12	279		0.0499894	0.46	10.4833	2	59.3		brackish	0.0046	0.07
1213	3	12	136		0.0374426	0.14	10.4833	2	59.3		brackish	0.0014	0.04
1213	3	10	162		0.98493	5.15	12.7033	4	21.88		brackish	0.0515	0.23
1213	3	6	33		0.04552	0.05	12.05	0.55	13.675		fresh	0.0005	0.02
1213	3	6	54		0.205771	0.4	12.05	0.55	13.675		fresh	0.004	0.06
1213	3	6	84		0.0372619	0.15	12.05	0.55	13.675		fresh	0.0015	0.04
1213	3	6	219		0.034319	0.25	12.05	0.55	13.675		fresh	0.0025	0.05
1213	3	6	14		0.0421071	0.02	12.05	0.55	13.675		fresh	0.0002	0.02
1213	3	6	24		0.0393917	0.04	12.05	0.55	13.675		fresh	0.0004	0.02
1213	3	6	52		0.0448904	0.1	12.05	0.55	13.675		fresh	0.001	0.03
1213	3	6	134		0.0318299	0.19	12.05	0.55	13.675		fresh	0.0019	0.04
1213	3	6	41		0.0432951	0.07	12.0333	0.55	10.21		fresh	0.0007	0.03
1213	3	6	57		0.0430719	0.08	12.0333	0.55	10.21		fresh	0.0008	0.03
1213	3	6	33		0.0455538	0.08	12.0333	0.55	10.21		fresh	0.0008	0.03
1213	3	6	38		0.066015	0.09	12.0333	0.55	10.21		fresh	0.0009	0.03
1213	3	6	50		0.0486729	0.09	12.0333	0.55	10.21		fresh	0.0009	0.03
1213	3	6	48		0.0394833	0.05	12.0333	0.55	10.21		fresh	0.0005	0.02
1213	3	6	48		0.0374406	0.05	12.0333	0.55	10.21		fresh	0.0005	0.02
1213	3	8	84		0.0504542	0.19	12.1833	0.55	14.25		fresh	0.0019	0.04
1213	3	8	216		0.0575745	0.81	12.1833	0.55	14.25		fresh	0.0081	0.09
1213	3	8	207		0.0646517	0.7	12.1833	0.55	14.25		fresh	0.007	0.08
1213	3	8	265		0.0650374	0.89	12.1833	0.55	14.25		fresh	0.0089	0.09
1213	3	8	209		0.0666129	0.39	12.1833	0.55	14.25		fresh	0.0039	0.06
1213	3	8	109		0.0613991	0.28	12.1833	0.55	14.25		fresh	0.0028	0.05
1213	3	8	108		0.0530028	0.25	12.1833	0.55	14.25		fresh	0.0025	0.05
1213	3	8	107		0.0490009	0.25	12.1833	0.55	14.25		fresh	0.0025	0.05
1213	3	8	335		0.0516925	0.76	12.1833	0.55	14.25		fresh	0.0076	0.09
1213	3	8	290		0.0445931	0.54	12.1833	0.55	14.25		fresh	0.0054	0.07
1213	3	8	86		0.04675	0.17	12.1833	0.55	14.25		fresh	0.0017	0.04
1213	3	6	91		0.0455419	0.12	12.17	2	30.45		brackish	0.0012	0.03
1213	3	6	37		0.0467811	0.05	12.17	2	30.45		brackish	0.0005	0.02
1213	3	8	58		0.0858157	0.11	12.7633	4	87.095		brackish	0.0011	0.03
1213	3	8	63		0.0522444	0.11	12.7633	4	87.095		brackish	0.0011	0.03
1213	3	8	103		0.0591005	0.24	12.7633	4	87.095		brackish	0.0024	0.05
1213	3	8	75		0.039149	0.1	12.7633	4	87.095		brackish	0.001	0.03
1213	3	8	685		0.104714	1.94	12.6067	4	40.065		brackish	0.0194	0.14
1213	3	8	165		0.0442497	0.24	12.6067	4	40.065		brackish	0.0024	0.05
1213	3	8	376		0.110892	1.13	12.6067	4	40.065		brackish	0.0113	0.11
1213	3	8	276		0.0483608	0.59	12.6067	4	40.065		brackish	0.0059	0.08
1213	3	8	226		0.231307	1.62	12.6067	4	40.065		brackish	0.0162	0.13
1213	3	8	232		0.0318228	0.29	12.6067	4	40.065		brackish	0.0029	0.05
1213	3	8	307		0.0449326	0.36	12.6067	4	40.065		brackish	0.0036	0.06
1213	3	8	237		0.119526	0.65	12.6067	4	40.065		brackish	0.0065	0.08
1213	3	12	126		0.0366183	0.15	13.2633	4	36.215		brackish	0.0015	0.04
1213	3	12	80		0.04635	0.11	13.2633	4	36.215		brackish	0.0011	0.03
1213	3	12	159		0.0567544	0.32	13.2633	4	36.215		brackish	0.0032	0.06
1213	3	12	98		0.0378939	0.15	13.2633	4	36.215		brackish	0.0015	0.04
1213	3	6	5		0.119507	0.01	16.5353	0.55	12.655		fresh	0.0001	0.01
1213	3	6	12		0.0736446	0.03	16.5353	0.55	12.655		fresh	0.0003	0.02
1213	3	6	0			0	16.5353	0.55	12.655		fresh	0	0
1213	3	6	6		0.0626	0.01	16.5353	0.55	12.655		fresh	0.0001	0.01
1213	3	6	10		0.162962	0.05	16.5353	0.55	12.655		fresh	0.0005	0.02
1213	3	6	3		1.20701	0.1	16.5353	0.55	12.655		fresh	0.001	0.03
1213	3	6	2		0.238318	0.01	16.5353	0.55	12.655		fresh	0.0001	0.01
1213	3	6	2		2.13845	0.13	16.5353	0.55	12.655		fresh	0.0013	0.04
1213	3	6	5		2.55934	0.34	16.5353	0.55	12.655		fresh	0.0034	0.06
1213	3	8	179		0.0641335	0.45	16.4433	0.55	13.81		fresh	0.0045	0.07
1213	3	8	89		0.0827149	0.2	17.2167	0.55	13.835		fresh	0.002	0.05
1213	3	8	262		0.0593228	0.43	17.2167	0.55	13.835		fresh	0.0043	0.07
1213	3	6	206		0.0496738	0.25	17.1033	4	54.345		brackish	0.0025	0.05
1213	3	6	124		0.0562387	0.22	17.1033	4	54.345		brackish	0.0022	0.05
1213	3	6	1		10.8499	0.51	17.8033	2	78.845		brackish	0.0051	0.07
1213	3	8	30		0.229523	0.13	17.9233	0.55	50.185		fresh	0.0013	0.04
1213	3	10	1		0.0707	0	18.89	0.55	27.345		fresh	0	0.01
1213	3	10	296		0.0618846	0.69	18.89	0.55	27.345		fresh	0.0069	0.08
1213	3	10	323		0.0568975	0.47	18.89	0.55	27.345		fresh	0.0047	0.07
1213	3	8	63		0.30501	0.62	18.7867	6	35.59		brackish	0.0062	0.08
1213	3	8	241		0.0847951	0.67	18.7867	6	35.59		brackish	0.0067	0.08
1213	3	8	23		0.0470739	0.03	18.7867	6	35.59		brackish	0.0003	0.02
1213	3	8	364		0.0844701	0.65	18.7867	6	35.59		brackish	0.0065	0.08
1314	1	8	2	0.00348942	0.0549	0.05	19.26	4	24.2	1325	brackish	0.0005	0.02
1314	1	10	1	0.00092535	0.0549	0.03	19.41	2	45	2421	brackish	0.0003	0.02
1314	1	10	18	0.0166563	0.0557778	0.35	19.41	2	45	2421	brackish	0.0035	0.06
1314	1	10	0	0		0	19.41	2	45	2421	brackish	0	0
1314	1	8	6	0.00164054	0.0480333	0.22	20.1	0.55	33.1	7229	fresh	0.0022	0.05
1314	1	8	128	0.0349982	0.0247797	0.56	20.1	0.55	33.1	7229	fresh	0.0056	0.08
1314	1	8	103	0.0281626	0.029432	0.67	20.1	0.55	33.1	7229	fresh	0.0067	0.08
1314	1	8	12	0.00328108	0.0549	0.17	20.1	0.55	33.1	7229	fresh	0.0017	0.04
1314	1	8	6	0.00164054	0.0343	0.07	20.1	0.55	33.1	7229	fresh	0.0007	0.03
1314	1	8	167	0.0456617	0.0281695	1.49	20.1	0.55	33.1	7229	fresh	0.0149	0.12
1314	1	8	101	0.0276158	0.0371762	0.71	20.1	0.55	33.1	7229	fresh	0.0071	0.08
1314	1	8	157	0.0429275	0.0273968	0.8	20.1	0.55	33.1	7229	fresh	0.008	0.09
1314	1	8	0	0		0	21.085	0.55	23.4	7229	fresh	0	0
1314	1	8	74	0.0103765	0.0426257	0.73	21.01	0.55	41.1	7230	fresh	0.0073	0.09
1314	1	8	43	0.00602959	0.0396163	1.04	21.01	0.55	41.1	7230	fresh	0.0104	0.1
1314	1	8	47	0.00659048	0.0503936	1.28	21.01	0.55	41.1	7230	fresh	0.0128	0.11
1314	1	8	29	0.00406647	0.0486552	1.39	21.01	0.55	41.1	7230	fresh	0.0139	0.12
1314	1	8	0	0		0	21.01	0.55	41.1	7230	fresh	0	0
1314	1	8	0	0		0	21.01	0.55	41.1	7230	fresh	0	0
1314	1	8	3	0.000420669	0.0411667	0.11	21.01	0.55	41.1	7230	fresh	0.0011	0.03
1314	1	10	28	0.0023808	0.0398536	0.25	21.135	0.55	37.1	7230	fresh	0.0025	0.05
1314	1	10	67	0.00569692	0.0240642	0.56	21.135	0.55	37.1	7230	fresh	0.0056	0.08
1314	1	10	69	0.00586697	0.0280188	0.53	21.135	0.55	37.1	7230	fresh	0.0053	0.07
1314	1	10	36	0.00306103	0.0355722	0.35	21.135	0.55	37.1	7230	fresh	0.0035	0.06
1314	1	10	72	0.00612206	0.0411833	0.67	21.135	0.55	37.1	7230	fresh	0.0067	0.08
1314	1	6	8	0.0061743	0.0549	0.19	20.21	4	33	2421	brackish	0.0019	0.04
1314	1	8	45	0.0172623	0.01602	0.23	19.86	4	54.4	2422	brackish	0.0023	0.05
1314	1	8	60	0.0230164	0.0433844	0.46	19.86	4	54.4	2422	brackish	0.0046	0.07
1314	1	8	4	0.00153442	0.0407531	0.04	19.86	4	54.4	2422	brackish	0.0004	0.02
1314	1	8	57	0.0218655	0.0522251	0.81	19.86	4	54.4	2422	brackish	0.0081	0.09
1314	1	8	110	0.0421966	0.0569796	1.42	19.86	4	54.4	2422	brackish	0.0142	0.12
1314	1	8	165	0.063295	0.0388806	1.31	19.86	4	54.4	2422	brackish	0.0131	0.11
1314	1	8	112	0.0429639	0.0170902	0.55	19.86	4	54.4	2422	brackish	0.0055	0.07
1314	1	8	14	0.00537048	0.0777698	0.26	19.86	4	54.4	2422	brackish	0.0026	0.05
1314	1	8	13	0.00498688	0.0790548	0.22	19.86	4	54.4	2422	brackish	0.0022	0.05
1314	1	8	1	0.000383606	0.084718	0.02	19.86	4	54.4	2422	brackish	0.0002	0.01
1314	1	8	86	0.0329901	0.0427313	0.78	19.86	4	54.4	2422	brackish	0.0078	0.09
1314	1	8	28	0.010741	0.0404586	0.29	19.86	4	54.4	2422	brackish	0.0029	0.05
1314	1	8	79	0.0303049	0.0519191	0.84	19.86	4	54.4	2422	brackish	0.0084	0.09
1314	1	8	568	0.217888	0.00762249	0.99	19.86	4	54.4	2422	brackish	0.0099	0.1
1314	1	8	51	0.0195639	0.0574969	0.51	19.86	4	54.4	2422	brackish	0.0051	0.07
1314	1	8	67	0.0257016	0.0240179	0.66	19.86	4	54.4	2422	brackish	0.0066	0.08
1314	1	8	79	0.0303049	0.0500949	1.01	19.86	4	54.4	2422	brackish	0.0101	0.1
1314	1	12	4	0.0223117	0.0466	0.03	20.45	6	58.3	1325	brackish	0.0003	0.02
1314	1	8	29	0.00591422	0.0492172	0.5	20.175	0.55	36.2	7229	fresh	0.005	0.07
1314	1	8	24	0.00266026	0.0509875	0.54	21.06	0.55	50.3	7230	fresh	0.0054	0.07
1314	1	8	4	0.000443377	0.0592	0.16	21.06	0.55	50.3	7230	fresh	0.0016	0.04
1314	1	10	11	0.000824211	0.0239545	0.02	21.14	0.55	44.9	7230	fresh	0.0002	0.02
1314	1	10	66	0.00494526	0.0364045	0.37	21.14	0.55	44.9	7230	fresh	0.0037	0.06
1314	1	10	24	0.00179828	0.0365708	0.12	21.14	0.55	44.9	7230	fresh	0.0012	0.04
1314	1	10	219	0.0164093	0.0506763	1.06	21.14	0.55	44.9	7230	fresh	0.0106	0.1
1314	1	8	0	0		0	20.325	6	21.5	1325	brackish	0	0
1314	1	8	0	0		0	20.325	6	21.5	1325	brackish	0	0
1314	1	6	0	0		0	21.41	6	45.9	1325	brackish	0	0
1314	1	6	10	0.0103268	0.0614526	0.26	21.41	6	45.9	1325	brackish	0.0026	0.05
1314	1	6	3	0.00309803	0.0835798	0.04	21.41	6	45.9	1325	brackish	0.0004	0.02
1314	1	8	9	0.00678556	0.105898	0.18	21.1	6	59	2421	brackish	0.0018	0.04
1314	1	8	23	0.0173409	0.132958	0.49	21.1	6	59	2421	brackish	0.0049	0.07
1314	1	8	10	0.00642356	0.3664	0.6	21.2	8	63.9	2421	brackish	0.006	0.08
1314	1	8	18	0.0115624	0.324332	0.99	21.2	8	63.9	2421	brackish	0.0099	0.1
1314	1	8	28	0.017986	0.208604	0.78	21.2	8	63.9	2421	brackish	0.0078	0.09
1314	1	8	12	0.00770827	0.307556	0.68	21.2	8	63.9	2421	brackish	0.0068	0.08
1314	1	8	25	0.0160589	0.221895	0.67	21.2	8	63.9	2421	brackish	0.0067	0.08
1314	1	8	20	0.0128471	0.314244	1.13	21.2	8	63.9	2421	brackish	0.0113	0.11
1314	1	8	0	0		0	21.2	8	63.9	2421	brackish	0	0
1314	1	8	645	0.0269418	0.0205281	0.97	21.595	0.55	23.7	7230	fresh	0.0097	0.1
1314	1	10	378	0.396779	0.00891243	0.55	20.915	8	64.8	1325	brackish	0.0055	0.07
1314	1	10	56	0.0587821	0.0270786	0.2	20.915	8	64.8	1325	brackish	0.002	0.04
1314	1	10	3	0.00314904	0.205105	0.07	20.915	8	64.8	1325	brackish	0.0007	0.03
1314	1	10	217	0.227781	0.0056	0.34	20.915	8	64.8	1325	brackish	0.0034	0.06
1314	1	10	7	0.00734776	0.00804286	0.01	20.915	8	64.8	1325	brackish	0.0001	0.01
1314	1	10	49	0.0514343	0.0644286	0.49	20.915	8	64.8	1325	brackish	0.0049	0.07
1314	1	10	0	0		0	20.915	8	64.8	1325	brackish	0	0
1314	1	10	0	0		0	20.915	8	64.8	1325	brackish	0	0
1314	1	10	2	0.00209936	0.0753	0.02	20.915	8	64.8	1325	brackish	0.0002	0.01
1314	1	12	4	0.00272921	0.176267	0.14	22.07	8	29.3	2421	brackish	0.0014	0.04
1314	1	12	11	0.00750532	0.00834545	0.02	22.07	8	29.3	2421	brackish	0.0002	0.01
1314	1	10	0	0		0	20.38	8.1	199	2422	brackish	0	0
1314	1	10	0	0		0	20.38	8.1	199	2422	brackish	0	0
1314	1	10	0	0		0	20.38	8.1	199	2422	brackish	0	0
1314	1	10	0	0		0	20.38	8.1	199	2422	brackish	0	0
1314	1	12	2	0.00130504	0.0289	0.01	20.63	8.1	38.65	2421	brackish	0.0001	0.01
1314	1	12	165	0.0374802	0.0492692	0.87	22.86	0.55	24.95	7229	fresh	0.0087	0.09
1314	1	12	363	0.0824563	0.0488039	2.37	22.86	0.55	24.95	7229	fresh	0.0237	0.15
1314	1	12	227	0.0515636	0.0192137	0.45	22.86	0.55	24.95	7229	fresh	0.0045	0.07
1314	1	12	170	0.0386159	0.0518324	1.74	22.86	0.55	24.95	7229	fresh	0.0174	0.13
1314	1	12	166	0.0377073	0.0563639	3.02	22.86	0.55	24.95	7229	fresh	0.0302	0.17
1314	1	12	148	0.0336186	0.0478636	1.4	22.86	0.55	24.95	7229	fresh	0.014	0.12
1314	1	12	0	0		0	22.635	0.55	10.2	7229	fresh	0	0
1314	1	10	415	0.507672	0.00558819	0.32	20.295	8	47.75	1325	brackish	0.0032	0.06
1314	1	10	90	0.110097	0.00933889	0.07	20.295	8	47.75	1325	brackish	0.0007	0.03
1314	1	10	2	0.00244661	0.01785	0	20.295	8	47.75	1325	brackish	0	0.01
1314	1	10	620	0.758449	0.0089356	0.6	20.295	8	47.75	1325	brackish	0.006	0.08
1314	1	10	5	0.00611652	0.27448	0.13	20.295	8	47.75	1325	brackish	0.0013	0.04
1314	1	10	443	0.541924	0.00669094	0.31	20.295	8	47.75	1325	brackish	0.0031	0.06
1314	1	10	161	0.196952	0.0148143	0.24	20.295	8	47.75	1325	brackish	0.0024	0.05
1314	1	10	237	0.289923	0.00536329	0.13	20.295	8	47.75	1325	brackish	0.0013	0.04
1314	1	10	155	0.189612	0.0195742	0.31	20.295	8	47.75	1325	brackish	0.0031	0.06
1314	1	10	323	0.395127	0.00712291	0.3	20.295	8	47.75	1325	brackish	0.003	0.05
1314	1	10	0	0		0	19.795	8.1	207.95	2421	brackish	0	0
1314	1	10	0	0		0	19.795	8.1	207.95	2421	brackish	0	0
1314	1	10	27	0.01553	0.20547	0.55	20.52	8.1	94.1	2421	brackish	0.0055	0.07
1314	1	10	22	0.00719585	0.0116091	0.05	20.905	0.55	23.15	7229	fresh	0.0005	0.02
1314	1	12	276	0.3883	0.00737313	0.24	19.505	6	26.6	1325	brackish	0.0024	0.05
1314	1	10	534	0.210563	0.00581386	0.55	19.12	8.1	38.15	2422	brackish	0.0055	0.07
1314	1	12	545	0.125811	0.00941022	1.94	24.79	0.55	23.9	7229	fresh	0.0194	0.14
1314	1	12	370	0.085413	0.0154059	1.12	24.79	0.55	23.9	7229	fresh	0.0112	0.11
1314	1	12	452	0.104342	0.0154916	0.94	24.79	0.55	23.9	7229	fresh	0.0094	0.1
1314	1	12	376	0.086798	0.020909	1.37	24.79	0.55	23.9	7229	fresh	0.0137	0.12
1314	1	12	433	0.0999563	0.00682956	0.58	24.79	0.55	23.9	7229	fresh	0.0058	0.08
1314	1	6	21	0.014415	0.0498524	0.17	21.055	4	17.1	2421	brackish	0.0017	0.04
1314	1	8	53	0.037491	0.0588396	0.54	21.31	4	21.3	2421	brackish	0.0054	0.07
1314	1	8	35	0.0232063	0.0881766	0.29	21.28	4	27.9	2421	brackish	0.0029	0.05
1314	2	14	688		0.0204093	0.92	22.1367	4	16.52		brackish	0.0092	0.1
1314	2	8	4		0.046075	0.02	20.5767	8.1	56.7467		brackish	0.0002	0.02
1314	2	8	296	0.0927356	0.0169726	0.41	21.1933	2	18.23	2422	brackish	0.0041	0.06
1314	2	8	0			0	14.36	2	16.08		brackish	0	0
1314	2	8	57	0.0197443	0.0146719	0.1	13.634	0.55	30.9533	3058	fresh	0.001	0.03
1314	2	8	26	0.0204493	0.0566033	0.06	8.96133	8.1	51.6533	2421	brackish	0.0006	0.03
1314	2	10	163		0.119715	0.81	10.2575	8.1	26.26		brackish	0.0081	0.09
1314	2	8	9		0.739345	0.38	8.79267	8.1	53.0733		brackish	0.0038	0.06
1314	2	8	43		0.0785813	0.31	20.5767	8.1	56.7467		brackish	0.0031	0.06
1314	2	10	408		0.0205277	0.65	10.6587	8	32.52		brackish	0.0065	0.08
1314	2	6	2		0.0848	0.01	13.9235	4	12.5		brackish	0.0001	0.01
1314	2	8	29	0.0100453	0.0179469	0.04	13.634	0.55	30.9533	3058	fresh	0.0004	0.02
1314	2	8	37	0.02248	0.0290148	0.07	8.89733	4	32.8867	2421	brackish	0.0007	0.03
1314	2	8	1		0.3307	0.02	8.96267	4	26.4		brackish	0.0002	0.02
1314	2	12	350	0.248547	0.0500046	0.98	9.90867	6	18.1933	2421	brackish	0.0098	0.1
1314	2	8	1		0.308509	0.02	8.66667	8.1	33.1733		brackish	0.0002	0.01
1314	2	12	930		0.0233601	1.78	18.2525	4	15.015		brackish	0.0178	0.13
1314	2	8	212		0.0106594	0.18	17.5373	4	18.4133		brackish	0.0018	0.04
1314	2	8	70		0.123496	0.17	17.4815	4	16.195		brackish	0.0017	0.04
1314	3	8	122		0.0623172	0.213829	9.10133	6	24.46		brackish	0.00213829	0.05
1314	3	10	392		0.0549676	0.96	9.6875	6	9.095		brackish	0.0096	0.1
1314	3	10	211		0.0339256	0.504425	9.6875	6	9.095		brackish	0.00504425	0.07
1314	3	14	416		0.0232702	0.54	9.876	8.1	16.0467		brackish	0.0054	0.07
1314	3	10	1196		0.0287096	1.19	12.1407	6	30.8		brackish	0.0119	0.11
1314	3	8	69		0.157417	0.574243	9.04867	2	20.2467		brackish	0.00574243	0.08
1314	3	10	134		0.0661343	0.487432	9.6875	6	9.095		brackish	0.00487432	0.07
1314	3	10	281		0.0276665	0.300933	9.2	8	21.42		brackish	0.00300933	0.05
1314	3	10	208		0.0468005	0.54	9.6875	6	9.095		brackish	0.0054	0.07
1314	3	10	217		0.0288272	0.26989	9.2	8	21.42		brackish	0.0026989	0.05
1314	3	8	104		0.0730134	0.428545	9.04867	2	20.2467		brackish	0.00428545	0.07
1314	3	10	458		0.0168138	0.384554	9.2	8	21.42		brackish	0.00384554	0.06
1314	3	8	5		1.49762	0.37	8.864	4	13.2133		brackish	0.0037	0.06
1314	3	8	61		0.227807	0.644926	9.04867	2	20.2467		brackish	0.00644926	0.08
1314	3	14	305		0.0345482	0.45	9.876	8.1	16.0467		brackish	0.0045	0.07
1314	3	12	323		0.0217087	0.47	9.814	6	8.625		brackish	0.0047	0.07
1314	3	8	40		0.223892	0.491531	9.04867	2	20.2467		brackish	0.00491531	0.07
1314	3	10	244		0.0325261	0.45	9.306	4	9.59		brackish	0.0045	0.07
1314	3	10	210		0.0978702	1.02	11.4	2	12		brackish	0.0102	0.1
1314	3	10	248		0.0209915	0.183779	9.2	8	21.42		brackish	0.00183779	0.04
1314	3	12	660		0.0373932	1.15	9.814	6	8.625		brackish	0.0115	0.11
1314	3	10	160		0.0285719	0.24	9.166	0.55	8.38		fresh	0.0024	0.05
1314	3	10	155		0.0350421	0.23	9.166	0.55	8.38		fresh	0.0023	0.05
1314	3	12	495		0.0292409	0.74	9.814	6	8.625		brackish	0.0074	0.09
1314	3	10	251		0.0527606	0.64	8.564	0.55	36.9267		fresh	0.0064	0.08
1314	3	10	534		0.0236219	0.316373	9.2	8	21.42		brackish	0.00316373	0.06
1314	3	12	1133		0.0311871	1.5	9.814	6	8.625		brackish	0.015	0.12
1314	3	10	134		0.0268582	0.257863	9.2	8	21.42		brackish	0.00257863	0.05
1314	3	8	125		0.0564586	0.301003	9.10133	6	24.46		brackish	0.00301003	0.05
1314	3	10	269		0.030454	0.46	9.6875	6	9.095		brackish	0.0046	0.07
1314	3	8	52		0.0647	0.226026	9.10133	6	24.46		brackish	0.00226026	0.05
1314	3	10	219		0.0478996	0.73	9.6875	6	9.095		brackish	0.0073	0.09
1314	3	10	422		0.019727	0.291996	9.2	8	21.42		brackish	0.00291996	0.05
1314	3	8	84		0.0778071	0.213073	9.10133	6	24.46		brackish	0.00213073	0.05
1314	3	8	28		0.223712	0.404333	9.04867	2	20.2467		brackish	0.00404333	0.06
1314	3	10	113		0.0312841	0.11	14.662	2	51.085		brackish	0.0011	0.03
1314	3	8	600		0.0226688	0.593294	14.1205	0.55	40.09		fresh	0.00593294	0.08
1314	3	8	266		0.0212444	0.242034	14.1205	0.55	40.09		fresh	0.00242034	0.05
1314	3	12	24		0.0593712	0.08	14.261	0.55	49.49		fresh	0.0008	0.03
1314	3	12	116		0.0493615	0.24	14.261	0.55	49.49		fresh	0.0024	0.05
1314	3	14	47		0.181929	0.4	14.488	0.55	34.945		fresh	0.004	0.06
1314	3	8	130		0.01986	0.13421	14.1205	0.55	40.09		fresh	0.0013421	0.04
1314	3	8	125		0.031592	0.173873	14.1205	0.55	40.09		fresh	0.00173873	0.04
1314	3	8	17		0.0417	0.03	14.164	0.55	28.015		fresh	0.0003	0.02
1314	3	8	144		0.0202889	0.0808568	14.1205	0.55	40.09		fresh	0.000808568	0.03
1314	3	8	159		0.0208478	0.132555	14.1205	0.55	40.09		fresh	0.00132555	0.04
1314	3	14	623		0.0346172	0.83	9.876	8.1	16.0467		brackish	0.0083	0.09
1314	3	14	137		0.122794	0.6	14.431	0.55	35.48		fresh	0.006	0.08
1314	3	14	39		0.0575737	0.12	14.431	0.55	35.48		fresh	0.0012	0.04
1314	3	8	343		0.0191761	0.280331	14.1205	0.55	40.09		fresh	0.00280331	0.052971
1314	3	8	251		0.0368826	0.389267	14.1205	0.55	40.09		fresh	0.00389267	0.0624318
1314	3	8	8		0.39093	0.16	14.164	0.55	28.015		fresh	0.0016	0.04
1314	3	8	443		0.0177914	0.19673	14.1205	0.55	40.09		fresh	0.0019673	0.04
1314	3	10	63		0.0570379	0.216092	13.857	0.55	23.33		fresh	0.00216092	0.05
1314	3	10	21		0.0955231	0.136165	13.857	0.55	23.33		fresh	0.00136165	0.04
1314	3	10	11		0.02586	0.00957554	13.857	0.55	23.33		fresh	9.57554e-05	0.01
1314	3	8	5		0.741999	0.16	13.8185	0.55	28.15		fresh	0.0016	0.04
1314	3	8	164		0.0247567	0.139049	14.1205	0.55	40.09		fresh	0.00139049	0.04
1314	3	8	52		0.0702904	0.15	14.0115	0.55	44.245		fresh	0.0015	0.04
1314	3	10	235		0.045941	0.34	14.662	2	51.085		brackish	0.0034	0.06
1314	3	10	25		0.0552844	0.0807212	13.857	0.55	23.33		fresh	0.000807212	0.03
1314	3	10	33		0.0635826	0.145327	13.857	0.55	23.33		fresh	0.00145327	0.04
1314	3	14	337		0.0211629	0.38	9.876	8.1	16.0467		brackish	0.0038	0.06
1314	3	10	2		0.0628	0.00558967	13.857	0.55	23.33		fresh	5.58967e-05	0.01
1314	3	14	47		0.0617231	0.13	14.431	0.55	35.48		fresh	0.0013	0.04
1314	3	10	52		0.0687468	0.149082	13.857	0.55	23.33		fresh	0.00149082	0.04
1314	3	8	0			0	13.8185	0.55	28.15		fresh	0	0
1314	3	10	6		0.072319	0.0386423	13.857	0.55	23.33		fresh	0.000386423	0.02
1314	3	10	45		0.0600519	0.121154	13.857	0.55	23.33		fresh	0.00121154	0.03
1314	3	10	25		0.0564879	0.0955802	13.857	0.55	23.33		fresh	0.000955802	0.03
1314	3	8	59		0.0569458	0.105555	16.984	0.55	13.335		fresh	0.00105555	0.03
1314	3	8	122		0.0326508	0.138703	9.10133	6	24.46		brackish	0.00138703	0.04
1314	3	14	27		0.137391	0.153217	15.843	0.55	16.94		fresh	0.00153217	0.04
1314	3	8	123		0.0253439	0.0923699	17.071	2	30.845		brackish	0.000923699	0.03
1314	3	10	176		0.0611818	0.318618	16.5315	0.55	17.19		fresh	0.00318618	0.06
1314	3	10	193		0.0704543	0.483989	16.5315	0.55	17.19		fresh	0.00483989	0.07
1314	3	10	319		0.0604997	1.15524	16.5315	0.55	17.19		fresh	0.0115524	0.11
1314	3	8	131		0.057295	0.534666	9.04867	2	20.2467		brackish	0.00534666	0.07
1314	3	10	136		0.0675074	0.599086	16.5315	0.55	17.19		fresh	0.00599086	0.08
1314	3	6	8		0.377425	0.159403	14.9465	0.55	9.965		fresh	0.00159403	0.04
1314	3	14	691		0.0231302	0.852017	17.5575	8	16.96		brackish	0.00852017	0.09
1314	3	8	100		0.018097	0.0803098	17.071	2	30.845		brackish	0.000803098	0.03
1314	3	10	454		0.0675986	1.32718	16.5315	0.55	17.19		fresh	0.0132718	0.12
1314	3	8	60		0.0355133	0.0852626	16.984	0.55	13.335		fresh	0.000852626	0.03
1314	3	10	267		0.0654779	0.846615	16.5315	0.55	17.19		fresh	0.00846615	0.09
1314	3	10	209		0.0342378	0.42	9.6875	6	9.095		brackish	0.0042	0.07
1314	3	10	178		0.0662239	0.52161	16.5315	0.55	17.19		fresh	0.0052161	0.07
1314	3	10	213		0.0700291	0.783826	16.5315	0.55	17.19		fresh	0.00783826	0.09
1314	3	8	70		0.0452757	0.151142	16.984	0.55	13.335		fresh	0.00151142	0.04
1314	3	10	517		0.0646099	1.16648	16.5315	0.55	17.19		fresh	0.0116648	0.11
1314	3	8	23		0.081975	0.0656508	15.7415	0.55	10.53		fresh	0.000656508	0.03
1314	3	10	212		0.0718302	0.514407	16.5315	0.55	17.19		fresh	0.00514407	0.07
1314	3	8	110		0.0351255	0.175062	9.10133	6	24.46		brackish	0.00175062	0.04
1314	3	8	5		1.40585	0.280811	14.164	0.55	28.015		fresh	0.00280811	0.05
1314	3	8	18		0.0269222	0.0260118	13.8185	0.55	28.15		fresh	0.000260118	0.02
1314	3	10	37		0.126725	0.27	9.18933	0.55	7.48667		fresh	0.0027	0.05
1314	3	14	170		0.0546088	0.353011	14.431	0.55	35.48		fresh	0.00353011	0.06
1314	3	10	127		0.0655692	0.280815	19.259	0.55	31.055		fresh	0.00280815	0.05
1314	3	10	293		0.0668881	0.744301	19.259	0.55	31.055		fresh	0.00744301	0.09
1314	3	12	873		0.0301533	1.37	9.814	6	8.625		brackish	0.0137	0.12
1314	3	10	119		0.0678487	0.234491	19.259	0.55	31.055		fresh	0.00234491	0.05
1314	3	10	101		0.0639535	0.220944	19.259	0.55	31.055		fresh	0.00220944	0.05
1314	3	10	79		0.0671228	0.133593	19.259	0.55	31.055		fresh	0.00133593	0.04
1314	3	10	47		0.0683532	0.108644	19.259	0.55	31.055		fresh	0.00108644	0.03
1314	3	10	271		0.0675517	0.782898	19.259	0.55	31.055		fresh	0.00782898	0.09
1314	3	8	151		0.024953	0.18629	9.10133	6	24.46		brackish	0.0018629	0.04
1314	3	10	166		0.0655452	0.305572	19.259	0.55	31.055		fresh	0.00305572	0.06
1314	3	10	31		0.0666323	0.061414	19.259	0.55	31.055		fresh	0.00061414	0.02
1314	3	10	163		0.064525	0.314606	19.259	0.55	31.055		fresh	0.00314606	0.06
1314	3	6	2		0.103375	0.00901894	18.4985	0.55	25.145		fresh	9.01894e-05	0.01
1314	3	8	22		0.226248	0.213597	18.366	4	22.14		brackish	0.00213597	0.05
1314	3	8	23		0.126848	0.243186	9.04867	2	20.2467		brackish	0.00243186	0.05
1314	3	8	35		0.157311	0.3	9.05667	0.55	10.96		fresh	0.003	0.06
1314	3	10	133		0.0632541	0.36	9.166	0.55	8.38		fresh	0.0036	0.06
1314	3	8	18		0.140192	0.16	8.864	4	13.2133		brackish	0.0016	0.04
1314	3	8	13		0.266002	0.241112	9.04867	2	20.2467		brackish	0.00241112	0.05
1314	3	14	432		0.064887	1.02	9.876	8.1	16.0467		brackish	0.0102	0.1
1314	3	8	130		0.116365	0.66	9.05667	0.55	10.96		fresh	0.0066	0.08
1314	3	14	212		0.0349962	0.34	9.876	8.1	16.0467		brackish	0.0034	0.06
1314	3	12	669		0.0410699	1.77	9.814	6	8.625		brackish	0.0177	0.13
1314	3	10	248		0.0280024	0.25374	9.2	8	21.42		brackish	0.0025374	0.05
1314	3	10	190		0.0567875	0.42	9.18933	0.55	7.48667		fresh	0.0042	0.06
1314	3	10	197		0.050924	0.6	9.6875	6	9.095		brackish	0.006	0.08
1314	3	10	152		0.0284053	0.22	9.6875	6	9.095		brackish	0.0022	0.05
1314	3	10	312		0.0287592	0.434585	9.6875	6	9.095		brackish	0.00434585	0.07
1314	3	10	413		0.0265082	0.544184	9.2	8	21.42		brackish	0.00544184	0.07
1314	3	8	46		0.234837	0.665506	9.04867	2	20.2467		brackish	0.00665506	0.08
1314	3	12	500		0.0238571	0.67	9.814	6	8.625		brackish	0.0067	0.08
1314	3	12	666		0.0267532	0.88	9.814	6	8.625		brackish	0.0088	0.09
1314	3	10	62		0.0534342	0.16	9.166	0.55	8.38		fresh	0.0016	0.04
1314	3	12	787		0.0444318	1.54	9.814	6	8.625		brackish	0.0154	0.12
1314	3	8	34		0.0763573	0.13	11.114	0.55	11.6067		fresh	0.0013	0.04
1314	3	8	65		0.0813206	0.23	11.114	0.55	11.6067		fresh	0.0023	0.05
1314	3	10	195		0.0395585	0.29	12.1407	6	30.8		brackish	0.0029	0.05
1314	3	8	298		0.0280936	0.349237	11.7587	4	25.5267		brackish	0.00349237	0.06
1314	3	10	784		0.0333151	1.03	12.1407	6	30.8		brackish	0.0103	0.1
1314	3	10	52		0.170715	0.54	11.7113	0.55	21.8267		fresh	0.0054	0.07
1314	3	10	95		0.0438583	0.32	9.166	0.55	8.38		fresh	0.0032	0.06
1314	3	12	79		0.0857684	0.3	12.1473	0.55	23.7533		fresh	0.003	0.05
1314	3	12	113		0.0659813	0.34	12.3773	0.55	30.5533		fresh	0.0034	0.06
1314	3	12	42		0.047269	0.1	12.1473	0.55	23.7533		fresh	0.001	0.03
1314	3	10	55		3.65842	7.66	11.3393	4	11.16		brackish	0.0766	0.28
1314	3	8	438		0.0264554	0.401813	11.7587	4	25.5267		brackish	0.00401813	0.06
1314	3	8	341		0.101457	1.4503	11.7587	4	25.5267		brackish	0.014503	0.12
1314	3	8	439		0.026889	0.48018	11.7587	4	25.5267		brackish	0.0048018	0.07
1314	3	8	59		0.090118	0.250363	9.10133	6	24.46		brackish	0.00250363	0.05
1314	3	10	481		0.0319651	0.56	12.1407	6	30.8		brackish	0.0056	0.07
1314	3	10	63		0.0375746	0.13	11.7113	0.55	21.8267		fresh	0.0013	0.04
1314	3	8	158		0.0418696	0.1956	11.7587	4	25.5267		brackish	0.001956	0.04
1314	3	10	51		1.52541	2.95	11.3393	4	11.16		brackish	0.0295	0.17
1314	3	8	147		0.0321396	0.183719	11.7587	4	25.5267		brackish	0.00183719	0.04
1314	3	8	110		0.0469318	0.206137	9.10133	6	24.46		brackish	0.00206137	0.05
1314	3	8	131		0.0328008	0.140252	11.7587	4	25.5267		brackish	0.00140252	0.04
1314	3	8	415		0.0180166	0.253806	11.7587	4	25.5267		brackish	0.00253806	0.05
1314	3	8	150		0.0789119	0.54	11.6847	0.55	18.7667		fresh	0.0054	0.07
1314	3	12	115		0.0655903	0.31	12.1473	0.55	23.7533		fresh	0.0031	0.06
1314	3	10	45		0.432919	1.14	11.4	2	12		brackish	0.0114	0.11
1314	3	8	374		0.148118	1.87396	11.7587	4	25.5267		brackish	0.0187396	0.14
1314	3	10	63		4.13164	11.65	11.3393	4	11.16		brackish	0.1165	0.35
1314	3	8	72		0.194352	0.6	11.1767	0.55	11.6867		fresh	0.006	0.08
1314	3	8	199		0.0438067	0.33	11.6847	0.55	18.7667		fresh	0.0033	0.06
1314	3	10	378		0.0347862	0.74	12.1407	6	30.8		brackish	0.0074	0.09
1314	3	10	550		0.0211507	0.600873	9.2	8	21.42		brackish	0.00600873	0.08
1314	3	12	293		0.0419369	0.76	9.814	6	8.625		brackish	0.0076	0.09
1314	3	8	490		0.0917289	1.55656	11.7587	4	25.5267		brackish	0.0155656	0.13
1314	3	10	74		4.19324	11.05	11.3393	4	11.16		brackish	0.1105	0.34
1314	3	8	7		0.161343	0.0653891	9.04867	2	20.2467		brackish	0.000653891	0.03
