# Supplementary material for: Foraging and metabolic consequences of semi-anadromy for an endangered estuarine fish
Source: PLoS One. 2017 Mar 14;12(3):e0173497. doi: 10.1371/journal.pone.0173497 (PMC5349674; doi:10.1371/journal.pone.0173497)
Supplement: S6 File — (XLSX) [file pone.0173497.s011.xlsx]

## Sheet: Sheet1
salinity	wet_weight	mo2
0.4	1.74	0.471572
0.4	1.39	0.496895
0.4	2.73	0.635196
0.4	1.54	0.272887
12	1.53	0.423597
12	1.15	0.371173
12	1.9	0.369717
12	2.65	0.691537
2	2.45	0.945337
2	2.77	0.622171
2	2.26	0.722199
2	1.1	0.491366
12	2.47	0.947822
12	2.6	0.527651
12	1.97	0.377587
12	1.15	0.247551
0.4	2.37	0.422343
0.4	2.52	0.338656
0.4	1.42	0.246873
0.4	2.72	1.10937
0.4	1.82	0.4478
0.4	1.95	0.681002
0.4	2.63	0.554002
0.4	2.15	0.450457
12	2.93	0.981926
12	1.5	0.20602
12	2.02	0.673746
12	1.76	0.636631
2	1.92	0.521361
2	2.3	0.380283
2	2.23	0.245944
2	2.67	0.543179
2	1.6	0.433631
2	1.35	0.429082
2	1.5	0.524415
2	1.32	0.408118
2	1.2	0.295379
2	2.08	0.639774
2	1.95	0.756452
2	1.21	0.379217
0.4	1.45	0.612914
0.4	2.73	0.589515
12	1.75	0.192146
12	3.33	0.34985
12	1.7	0.241472
12	1.98	0.30504
0.4	2	0.636415
0.4	1.58	0.218193
0.4	1.9	0.557954
0.4	2.08	0.295723
12	2.1	0.590413
12	2.09	0.356889
12	2.2	0.435984
12	1.5	0.519798
12	1.41	0.650711
12	2.05	0.416263
12	0.94	0.227064
12	1.73	0.544693
2	1.98	0.504255
2	1.76	0.599626
2	2.75	0.652125
2	2.63	0.928535
